# Supplementary material
Source: MDPI journal article supplement (https://www.mdpi.com/2075-163X/9/3/162)
Supplement: s1 [file s1]

## Supplementary Materials:

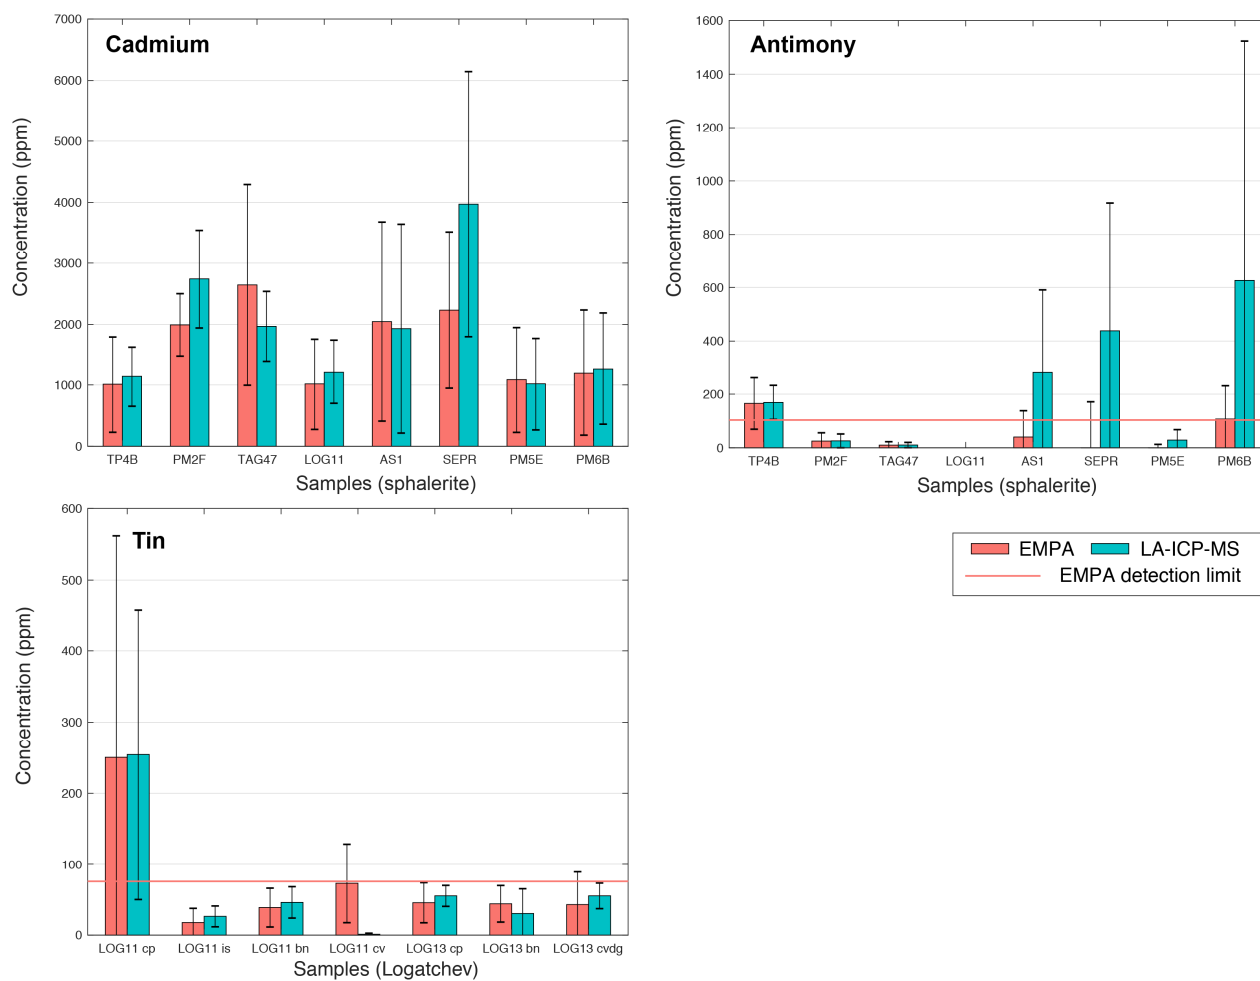

**Figure S1.** EMPA and LA-ICP-MS results of sphalerite with high concentrations of Cd, Sb and Sn (where concentrations are high enough to exceed EMPA detection limits; shown as horizontal line).

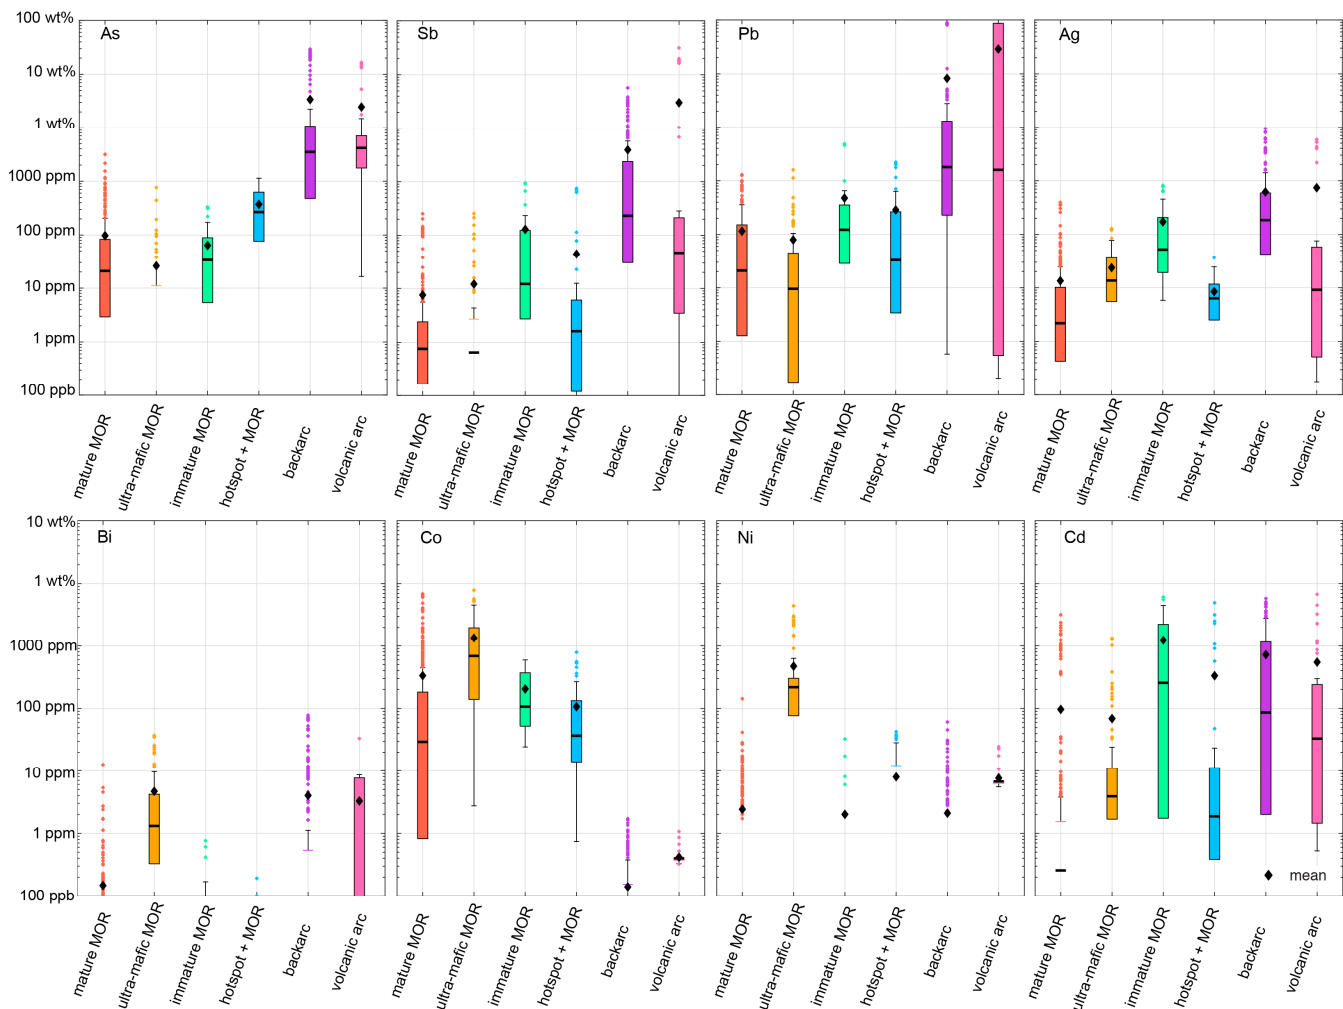

**Figure S2.** LA-ICP-MS dataset for trace As, Sb, Pb, Ag, Bi, Co, Ni and Cd in all sulfide minerals analysed as a function of geological setting. This excludes tennantite-tetrahedrite and galena, as they are the principal carriers of As, Sb and Pb. Also excluded are sulfides from volcanic arc settings (Palinuro) where only EMPA data was available, which does not include these elements (Ag, Bi, Co, Ni, Cd).

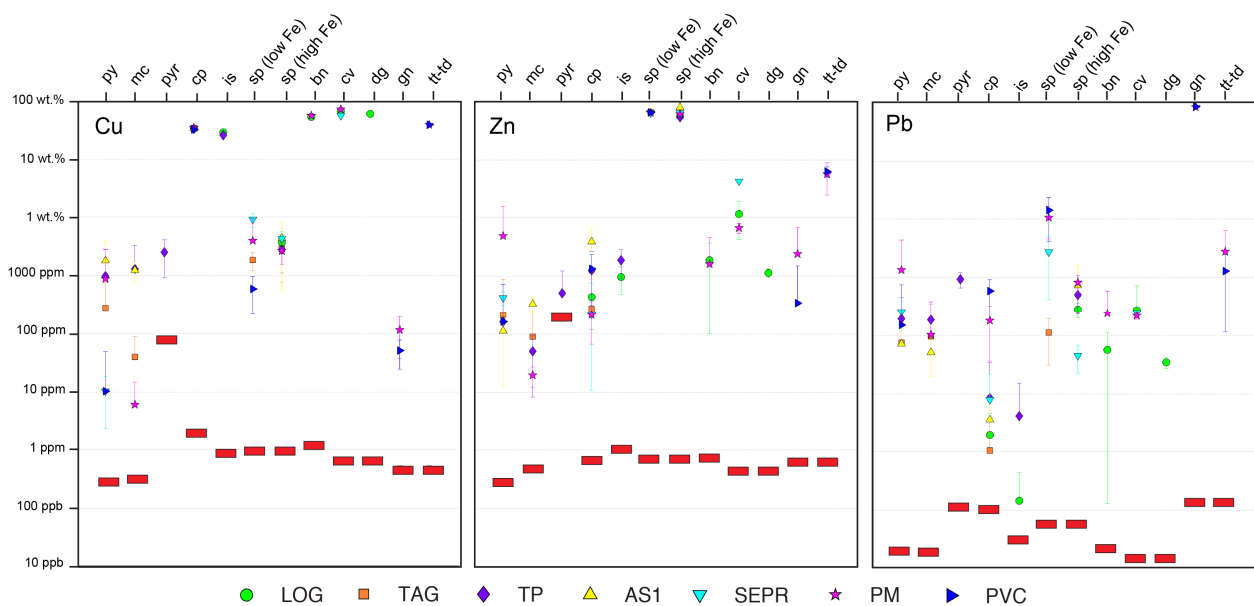

**Figure S3.** Mean trace element concentrations (Cu, Zn and Pb) in sulfide minerals from all hydrothermal vent sites investigated in this study (based on 625 LA-ICP-MS spot analyses). Also included in this figure are 111 EMPA trace element concentrations of Cu, Zn, Pb, As and Sb where LA-ICP-MS data was unavailable or limited (see text for

discussion). Error bars indicate standard deviation around the arithmetic average. The red bars represent the arithmetic average of LA-ICP-MS detection limit of each element for each mineral phase. Data that is below the detection limit is shown for added clarity for the reader, where confidence levels for values below detection limits is less than 99.9%. Abbreviations of hydrothermal sites used in this figure include LOG (*Logatchev*), TAG (*Trans-Atlantic Geotraverse*), TP (*Turtle Pits*), AS1 (*Axial Seamount*), SEPR (*South East Pacific Rise*), PM (*Pacmanus*) and PVC (*Palinuro*). Abbreviations of minerals used in this figure include py (pyrite), c.py (colloform pyrite), mc (marcasite), c.mc (colloform marcasite), pyr (pyrrhotite), ccp (chalcopyrite), is (isocubanite), sp (sphalerite), bn (bornite), cv (covellite), dg (digenite), gn (galena), tt-td (tennantite-tetrahedrite).

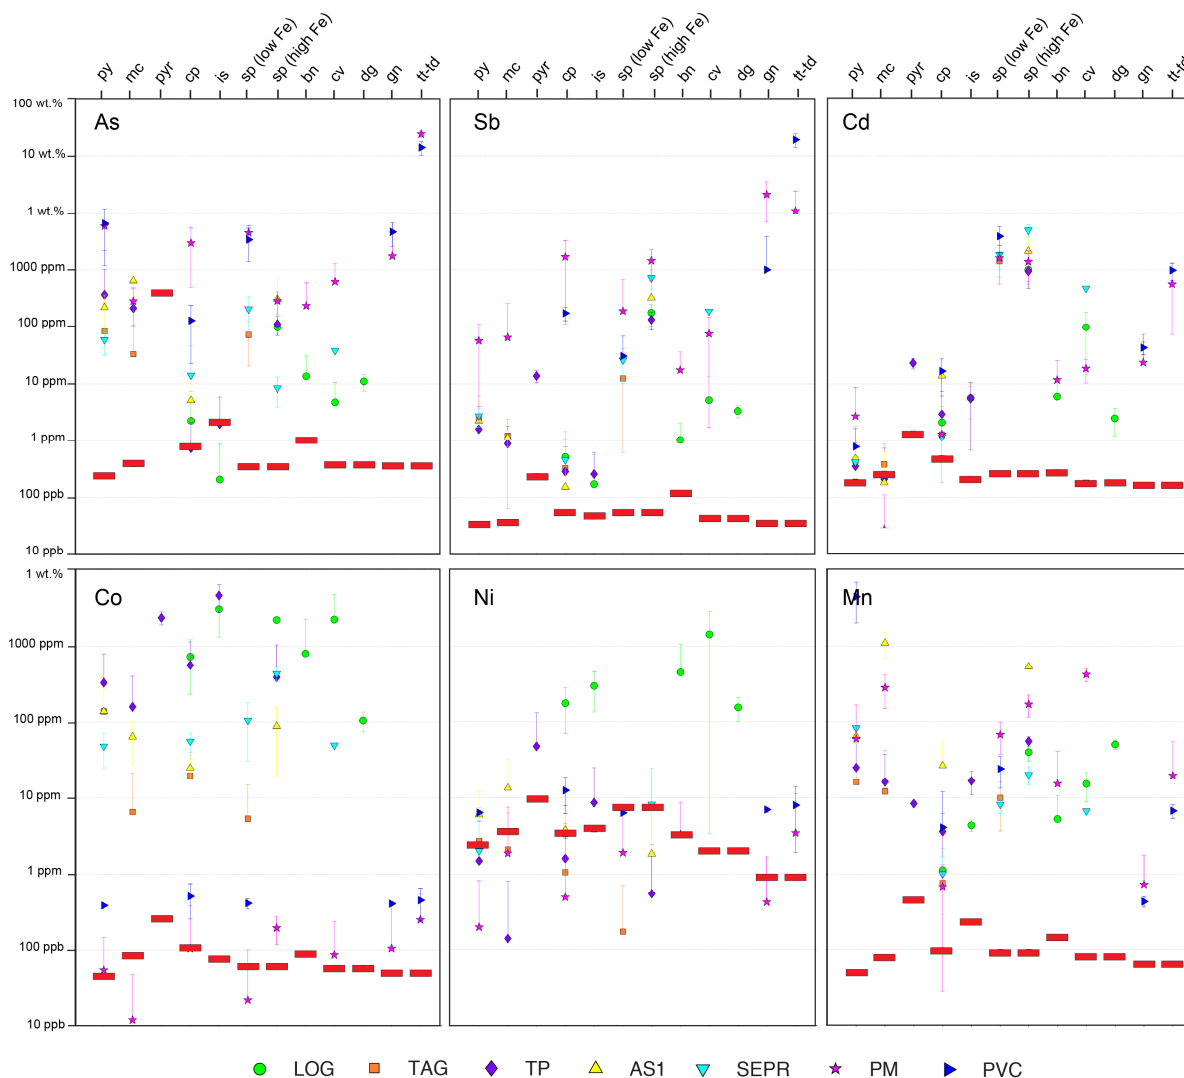

**Figure S4.** Mean trace element concentrations (As, Sb, Cd, Co, Ni, Mn) in sulfide minerals from all hydrothermal vent sites investigated in this study (based on 625 LA-ICP-MS spot analyses). Also included in this figure are 111 EMPA trace element concentrations of Cu, Zn, Pb, As and Sb where LA-ICP-MS data was unavailable or limited (see text for discussion). Error bars indicate standard deviation around the arithmetic average. The red bars represent the arithmetic average of LA-ICP-MS detection limit of each element for each mineral phase. Data that is below the detection limit is shown for added clarity for the reader, where confidence levels for values below detection limits is less than 99.9%. Abbreviations of hydrothermal sites used in this figure include LOG (*Logatchev*), TAG (*Trans-Atlantic Geotraverse*), TP (*Turtle Pits*), AS1 (*Axial Seamount*), SEPR (*South East Pacific Rise*), PM (*Pacmanus*) and PVC (*Palinuro*). Abbreviations of minerals used in this figure include py (pyrite), c.py (colloform pyrite), mc (marcasite), c.mc (colloform marcasite), pyr (pyrrhotite), ccp (chalcopyrite), is (isocubanite), sp (sphalerite), bn (bornite), cv (covellite), dg (digenite), gn (galena), tt-td (tennantite-tetrahedrite).

**Table S1:** Electron microprobe analysis set up parameters. Background count times are always half of the peak count time. All calibration was performed with a beam current of 10 nA.

| Set Up                                                                                                                                                                                        | Beam Current (nA) | Spot Size (μm) | Element         | Line | Spectrometer | Crystal | Peak  | Bg – ve Offset | Bg +ve Offset | Peak Count Time (s) | Average Detection Limit (ppm) |
|-----------------------------------------------------------------------------------------------------------------------------------------------------------------------------------------------|-------------------|----------------|-----------------|------|--------------|---------|-------|----------------|---------------|---------------------|-------------------------------|
| 1) All sulfide minerals (excluding galena & sulfosalts)                                                                                                                                       | 150               | 5              | Fe              | Kα   | 5            | LLIF    | 48083 | 1000           | 1000          | 30                  | 197                           |
|                                                                                                                                                                                               |                   |                | S               | Kα   | 2            | PET     | 61430 | 600            | 800           | 20                  | 176                           |
|                                                                                                                                                                                               |                   |                | Pb <sup>1</sup> | Lα   | 3            | LLIF    | 29155 | 800            | 800           | 60                  | 275                           |
|                                                                                                                                                                                               |                   |                | As <sup>1</sup> | Kα   | 5            | LLIF    | 29226 | 800            | 800           | 60                  | 172                           |
|                                                                                                                                                                                               |                   |                | Cu              | Kα   | 4            | LIF     | 38250 | 400            | 1000          | 100                 | 148                           |
|                                                                                                                                                                                               |                   |                | Zn              | Kα   | 3            | LLIF    | 35631 | 500            | 800           | 30                  | 62                            |
|                                                                                                                                                                                               |                   |                | Sb              | Lα   | 1            | LPET    | 39306 | 500            | 250           | 60                  | 85                            |
| 2) Specific As/Pb analyses (sulfosalts and As/Pb in minerals where no LA-ICP-MS data was obtained (pyrrhotite in TP4B and fine-grained colloform pyrite and chalcopyrite in Pacmanus samples) | 150               | 1              | Fe              | Kα   | 5            | LLIF    | 48083 | 1000           | 1000          | 30                  | 115                           |
|                                                                                                                                                                                               |                   |                | S               | Kα   | 2            | PET     | 61430 | 600            | 800           | 20                  | 181                           |
|                                                                                                                                                                                               |                   |                | Pb              | Lβ   | 3            | LLIF    | 24386 | 600            | 600           | 60                  | 574                           |
|                                                                                                                                                                                               |                   |                | As              | Lα   | 4            | TAP     | 37639 | 600            | 500           | 180                 | 72                            |
|                                                                                                                                                                                               |                   |                | Cu              | Kα   | 5            | LLIF    | 38250 | 400            | 1000          | 30                  | 230                           |
|                                                                                                                                                                                               |                   |                | Zn              | Kα   | 3            | LLIF    | 35631 | 500            | 800           | 20                  | 91                            |
|                                                                                                                                                                                               |                   |                | Sb              | Lα   | 1            | LPET    | 39306 | 500            | 250           | 60                  | 81                            |
|                                                                                                                                                                                               |                   |                | Mn              | Kα   | 5            | LLIF    | 52205 | 1000           | 800           | 30                  | 86                            |
|                                                                                                                                                                                               |                   |                | Co              | Kα   | 3            | LLIF    | 44427 | 200            | 200           | 30                  | 71                            |
| 3) Hg analyses (chalcopyrite and tennantite-tetrahedrite)                                                                                                                                     | 150               | 1              | Fe              | Kα   | 4            | LIF     | 48083 | 1000           | 1000          | 30                  | 270                           |
|                                                                                                                                                                                               |                   |                | S               | Kα   | 2            | PET     | 61430 | 600            | 800           | 20                  | 191                           |

<sup>1</sup> Analyses of Pb Lα and As Kα interfere with each other and were not used during trace element studies. Where Pb and As analyses were important (in minerals/samples where no LA-ICP-MS data was obtained), they were undertaken again using a specific set up to avoid interferences outlined in Table S2. Where Pb analyses were important for galena (use as internal standard for LA-ICP-MS data), they were analysed again, combined with further analyses of Hg, outlined in Table S6.

| Set Up                                         | Beam Current (nA) | Spot Size (μm) | Element         | Line | Spectrometer | Crystal | Peak  | Bg – ve Offset | Bg +ve Offset | Peak Count Time (s) | Average Detection Limit (ppm) |
|------------------------------------------------|-------------------|----------------|-----------------|------|--------------|---------|-------|----------------|---------------|---------------------|-------------------------------|
| (excluding PVC)                                |                   |                | As <sup>1</sup> | Kα   | 5            | LLIF    | 37639 | 800            | 800           | 60                  | 325                           |
|                                                |                   |                | Cu              | Kα   | 4            | LIF     | 38250 | 400            | 1000          | 30                  | 447                           |
|                                                |                   |                | Zn              | Kα   | 5            | LLIF    | 35631 | 500            | 800           | 60                  | 142                           |
|                                                |                   |                | Sb              | Lα   | 2            | PET     | 39306 | 500            | 250           | 120                 | 124                           |
|                                                |                   |                | Hg              | Mα   | 1            | LPET    | 64448 | 800            | 500           | 150                 | 92                            |
|                                                |                   |                | Hg              | Mα   | 3            | LPET    | 64448 | 800            | 500           | 150                 | 92                            |
| 4) Hg in pyrite and pyrrhotite (excluding PVC) | 150               | 1              | Fe              | Kα   | 4            | LIF     | 48083 | 1000           | 1000          | 30                  | 125                           |
|                                                |                   |                | S               | Kα   | 2            | PET     | 61430 | 600            | 800           | 20                  | 201                           |
|                                                |                   |                | As <sup>1</sup> | Kα   | 5            | LLIF    | 37639 | 800            | 800           | 80                  | 275                           |
|                                                |                   |                | Cu              | Kα   | 4            | LIF     | 38250 | 400            | 1000          | 90                  | 117                           |
|                                                |                   |                | Zn              | Kα   | 5            | LLIF    | 35631 | 500            | 800           | 60                  | 550                           |
|                                                |                   |                | Sb              | Lα   | 2            | PET     | 39306 | 500            | 250           | 120                 | 130                           |
|                                                |                   |                | Hg              | Mα   | 1            | LPET    | 64448 | 800            | 500           | 150                 | 100                           |
|                                                |                   |                | Hg              | Mα   | 3            | LPET    | 64448 | 800            | 500           | 150                 | 100                           |
| 5) Hg in sphalerite (excluding PVC)            | 150               | 1              | Fe              | Kα   | 4            | LIF     | 48083 | 1000           | 1000          | 120                 | 129                           |
|                                                |                   |                | S               | Kα   | 2            | PET     | 61430 | 600            | 800           | 20                  | 196                           |

| Set Up                                                       | Beam Current (nA)              | Spot Size (μm) | Element         | Line | Spectrometer | Crystal | Peak  | Bg – ve Offset | Bg +ve Offset | Peak Count Time (s) | Average Detection Limit (ppm) |
|--------------------------------------------------------------|--------------------------------|----------------|-----------------|------|--------------|---------|-------|----------------|---------------|---------------------|-------------------------------|
|                                                              |                                |                | As <sup>1</sup> | Kα   | 5            | LLIF    | 37639 | 800            | 800           | 90                  | 271                           |
|                                                              |                                |                | Cu              | Kα   | 5            | LLIF    | 38250 | 400            | 1000          | 60                  | 145                           |
|                                                              |                                |                | Zn              | Kα   | 4            | LIF     | 35631 | 500            | 800           | 30                  | 533                           |
|                                                              |                                |                | Sb              | Lα   | 2            | PET     | 39306 | 500            | 250           | 120                 | 128                           |
|                                                              |                                |                | Hg              | Mα   | 1            | LPET    | 64448 | 800            | 500           | 150                 | 96                            |
|                                                              |                                |                | Hg              | Mα   | 3            | LPET    | 64448 | 800            | 500           | 150                 | 96                            |
| 6) Pb and Hg in galena (to avoid interferences)              | 200                            | 1              | Fe              | Kα   | 5            | LLIF    | 48083 | 500            | 400           | 60                  | 50                            |
|                                                              |                                |                | S               | Kα   | 2            | PET     | 61430 | 600            | 800           | 20                  | 160                           |
|                                                              |                                |                | Pb              | Lβ   | 4            | LIF     | 29154 | 800            | 800           | 30                  | 1607                          |
|                                                              |                                |                | As              | Lα   | 4            | LTAP    | 37639 | 600            | 500           | 400                 | 29                            |
|                                                              |                                |                | Cu              | Kα   | 5            | LLIF    | 38250 | 400            | 1000          | 130                 | 69                            |
|                                                              |                                |                | Zn              | Kα   | 5            | LLIF    | 35631 | 500            | 800           | 130                 | 67                            |
|                                                              |                                |                | Sb              | Lα   | 2            | PET     | 39306 | 500            | 250           | 300                 | 82                            |
|                                                              |                                |                | Hg              | Mα   | 3            | LPET    | 64448 | 800            | 2000          | 200                 | 100                           |
|                                                              |                                |                |                 |      |              |         |       |                |               |                     |                               |
| 7) Hg in PVC tennantite-tetrahedrite<br><br>DS4 slit setting | 50 (to avoid dead time for Cu) | 5              | Fe              | Kα   | 5            | LLIF    | 48083 | 1000           | 1000          | 120                 | 75                            |
|                                                              |                                |                | S               | Kα   | 2            | PET     | 61430 | 600            | 800           | 20                  | 302                           |

| Set Up                           | Beam Current (nA)               | Spot Size (μm) | Element | Line | Spectrometer | Crystal | Peak  | Bg – ve Offset | Bg +ve Offset | Peak Count Time (s) | Average Detection Limit (ppm) |
|----------------------------------|---------------------------------|----------------|---------|------|--------------|---------|-------|----------------|---------------|---------------------|-------------------------------|
| Differential auto mode           |                                 |                | Pb      | Lβ   | 5            | LLIF    | 24375 | 800            | 800           | 130                 | 1071                          |
|                                  |                                 |                | As      | Lα   | 4            | LTAP    | 37639 | 600            | 500           | 400                 | 101                           |
|                                  |                                 |                | Cu      | Kα   | 5            | LLIF    | 38250 | 400            | 1000          | 130                 | 212                           |
|                                  |                                 |                | Zn      | Kα   | 4            | LIF     | 35631 | 500            | 800           | 30                  | 605                           |
|                                  |                                 |                | Sb      | Lα   | 2            | PET     | 39306 | 500            | 250           | 300                 | 191                           |
|                                  |                                 |                | Hg      | Mα   | 3            | LPET    | 64448 | 800            |               | 400                 | 287                           |
| 8) Hg in PVC and PM5E sphalerite | 100 (to avoid dead time for Zn) | 5              | Fe      | Kα   | 5            | LLIF    | 48083 | 1000           | 1000          | 120                 | 35                            |
|                                  |                                 |                | S       | Kα   | 2            | PET     | 61430 | 600            | 800           | 20                  | 170                           |
|                                  |                                 |                | Pb      | Lβ   | 5            | LLIF    | 24375 | 600            | 600           | 130                 | 530                           |
|                                  |                                 |                | As      | Lα   | 1            | LTAP    | 37639 | 600            | 500           | 400                 | 33                            |
|                                  |                                 |                | Cu      | Kα   | 5            | LLIF    | 38250 | 400            | 1000          | 130                 | 46                            |
|                                  |                                 |                | Zn      | Kα   | 4            | LIF     | 35631 | 500            | 800           | 30                  | 316                           |
|                                  |                                 |                | Sb      | Lα   | 2            | PET     | 39306 | 500            | 250           | 300                 | 62                            |
|                                  |                                 |                | Hg      | Mα   | 3            | LPET    | 64448 | 800            | 500           | 400                 | 110                           |
| 9) Hg in PVC pyrite              | 200                             | 1              | Fe      | Kα   | 5            | LLIF    | 48083 | 1000           | 1000          | 120                 | 103                           |
|                                  |                                 |                | S       | Kα   | 2            | PET     | 61430 | 600            | 800           | 20                  | 163                           |

| Set Up | Beam Current (nA) | Spot Size (μm) | Element | Line | Spectrometer | Crystal | Peak  | Bg – ve Offset | Bg +ve Offset | Peak Count Time (s) | Average Detection Limit (ppm) |
|--------|-------------------|----------------|---------|------|--------------|---------|-------|----------------|---------------|---------------------|-------------------------------|
|        |                   |                | Pb      | Lβ   | 5            | LLIF    | 24375 | 600            | 600           | 130                 | 486                           |
|        |                   |                | As      | Lα   | 1            | LTAP    | 37639 | 600            | 500           | 400                 | 24                            |
|        |                   |                | Cu      | Kα   | 5            | LLIF    | 38250 | 400            | 1000          | 130                 | 45                            |
|        |                   |                | Zn      | Kα   | 4            | LIF     | 35631 | 500            | 800           | 30                  | 272                           |
|        |                   |                | Sb      | Lα   | 2            | PET     | 39306 | 500            | 250           | 300                 | 59                            |
|        |                   |                | Hg      | Mα   | 3            | LPET    | 64448 | 800            | 2000          | 400                 | 90                            |



**Table S2:** Comparison of measured concentrations (calculated using NISTSRM610 as the external standard, with no normalisation using an internal standard (100 wt.% normalisation) of the same elements from different reference materials versus their published or communicated values, after 3 sigma outlier elimination. *\*(information value)*.

| SRM        | Reference | Published values and pers. commun. |       |       |      |        |         |         |       |      |      |      |      |      | Measured values |       |       |        |       |         |        |       |      |      |      |       |      | N    |
|------------|-----------|------------------------------------|-------|-------|------|--------|---------|---------|-------|------|------|------|------|------|-----------------|-------|-------|--------|-------|---------|--------|-------|------|------|------|-------|------|------|
|            |           | Fe                                 | Cu    | Pb    | Zn   | As     | Ni      | Mn      | Co    | Ag   | Cd   | Sn   | Sb   | Bi   | Fe              | Cu    | Pb    | Zn     | As    | Ni      | Mn     | Co    | Ag   | Cd   | Sn   | Sb    | Bi   |      |
| GOR132-G   | GeoReM    | 78508 ±                            | 205   | 19.5  | 76.8 | (0.2)* | 1187 ±  | 1192.7  | 92.7  | 0.04 | 0.08 | 0.34 | 0.06 | 0.01 | 78940 ±         | 221   | 19.7  | 77.6 ± | 0.33  | 1240 ±  | 1188   | 97.6  | 0.08 | 0.36 | 0.28 | 0.12  | 0.04 | 136- |
|            | preferred | 777                                | ± 21  | ± 1.7 | ±    |        | 58      | ± 54.2  | ± 5.7 |      |      | ±    | ±    | 07 ± | 2304            | ± 7.2 | ± 1.3 | 5.7    | ±     | 34.6    | ± 27.4 | ± 2.5 | ±    | ±    | ±    | ±     | ±    | 150  |
|            | values    |                                    |       |       | 12.5 |        |         |         |       |      |      | 0.09 | 0.04 | 0.00 |                 |       |       |        | 0.91  |         |        |       | 0.07 | 0.61 | 0.13 | 0.14  | 0.06 |      |
| KL2-G      | GeoReM    | 83172 ±                            | 87.9  | 2.1 ± | 110  | (0.2)* | 112 ± 5 | 1277.9  | 41.2  | 0.15 | 0.09 | 1.54 | 0.14 | 0.04 | 83347 ±         | 93.7  | 1.9 ± | 115.7  | 0.14  | 112.2 ± | 1298   | 43.3  | 0.09 | 0.00 | 1.31 | 0.2 ± | 0.04 | 31-  |
|            | preferred | 777                                | ± 9.1 | 0.1   | ± 10 |        |         | ± 69.7  | ± 2.3 |      |      | ±    | ±    | ±    | 1676            | ± 3.3 | 0.3   | ± 7.9  | ± 1.2 | 6.7     | ± 17.5 | ± 1.2 | ±    | ±    | ±    | 0.13  | ±    | 34   |
|            | values    |                                    |       |       |      |        |         |         |       |      |      | 0.29 | 0.03 | 0.01 |                 |       |       |        |       |         |        |       | 0.09 | 0.42 | 0.32 |       | 0.04 |      |
| StHs6-80-G | GeoReM    | 33968 ±                            | 41.5  | 10.3  | 67 ± | 2.73 ± | 23.7 ±  | 588.6 ± | 13.2  | 0.02 | 0.10 | 1.10 | 0.20 | 0.11 | 33122 ±         | 39.9  | 10.3  | 64.9 ± | 2.4 ± | 21.8 ±  | 568.9  | 12.8  | 0.03 | 0.10 | 0.72 | 0.21  | 0.09 | 18-  |
|            | preferred | 544                                | ± 8.3 | ± 0.9 | 7    | 0.48   | 3.8     | 31      | ± 1.1 |      |      | ±    | ±    | ±    | 824             | ± 2.6 | ± 0.7 | 5.9    | 0.86  | 4.9     | ± 12.5 | ± 0.5 | ±    | ±    | ±    | ±     | ±    | 20   |
|            | values    |                                    |       |       |      |        |         |         |       |      |      | 0.2  | 0.07 | 0.07 |                 |       |       |        |       |         |        |       | 0.05 | 0.29 | 0.26 | 0.11  | 0.03 |      |
| T1-G       | GeoReM    | 50059 ±                            | 18.8  | 11.6  | 74 ± | 0.96 ± | 10.6 ±  | 983.6 ± | 18.9  | 0.10 | 0.20 | 2.00 | 0.25 | 0.10 | 48421 ±         | 19.9  | 9.8 ± | 72.7 ± | 1.00  | 10.3 ±  | 1005.  | 18.6  | 0.03 | 0.52 | 1.55 | 0.36  | 0.10 | 68-  |
|            | preferred | 466                                | ± 2   | ± 1.5 | 10   | 0.44   | 1.3     | 46.5    | ± 0.8 |      |      | ±    | ±    | ±    | 1810            | ± 1.2 | 0.7   | 4.1    | ±     | 2.5     | 9 ±    | ± 0.8 | ±    | ±    | ±    | ±     | ±    | 75   |
|            | values    |                                    |       |       |      |        |         |         |       |      |      | 0.5  | 0.05 | 0.05 |                 |       |       |        | 0.98  |         | 34.1   |       | 0.06 | 0.67 | 0.21 | 0.14  | 0.05 |      |

**Table S3:** Comparison of measurements between LA-ICP-MS (prior to normalisation with EMPA measurements) and EMPA data for trace elements that are in high enough concentration to be detected by both techniques (Cd, Sb, Co, Ni). No comparison of As and Pb can be made between EMPA and LA-ICP-MS measurements due to the interference of the lines chosen for respective elements during EMPA. Concentrations of Ag, Sn and Bi are generally below detection limits for EMPA, making comparison impossible. Standard deviations (SD) around the mean value are also presented. SD is always higher than the associated error on the measurement.

| Sample                                                  | Mineral  | Mean concentration (LA-ICP-MS) |      |      |     |    |    |    |    |    | Mean concentration (EMPA) |      |     |      |    |    |    |    |    |  |
|---------------------------------------------------------|----------|--------------------------------|------|------|-----|----|----|----|----|----|---------------------------|------|-----|------|----|----|----|----|----|--|
|                                                         |          | Co                             | SD   | Ni   | SD  | Cd | SD | Sb | SD | N  | Co                        | SD   | Ni  | SD   | Cd | SD | Sb | SD | N  |  |
| Cu phases: Co, Ni from high-T, ultra-mafic hosted sites |          |                                |      |      |     |    |    |    |    |    |                           |      |     |      |    |    |    |    |    |  |
| LOG11                                                   | cp       | 1037                           | 404  | 257  | 37  |    |    |    |    | 21 | 1015                      | 371  | 215 | 61   |    |    |    |    | 13 |  |
| LOG13                                                   | cp       | 182                            | 5    | 24   | 5   |    |    |    |    | 7  | 161                       | 58   | bdl |      |    |    |    |    | 13 |  |
| LOG11                                                   | is       | 3852                           | 734  | 351  | 121 |    |    |    |    | 8  | 5037                      | 1002 | 409 | 100  |    |    |    |    | 21 |  |
| LOG11                                                   | bn       | 1490                           | 1805 | 796  | 660 |    |    |    |    | 9  | 685                       | 1138 | 332 | 640  |    |    |    |    | 25 |  |
| LOG13                                                   | bn       | 23                             | 19   | 46   | 51  |    |    |    |    | 8  | bdl                       |      | bdl |      |    |    |    |    | 11 |  |
| LOG11                                                   | cc-cv-dg | 4390                           | 2021 | 2655 | 989 |    |    |    |    | 8  | 3565                      | 2764 | 871 | 1149 |    |    |    |    | 38 |  |

|                                  |          |      |      |     |    |      |      |      |     |   |      |      |     |  |      |      |      |      |    |
|----------------------------------|----------|------|------|-----|----|------|------|------|-----|---|------|------|-----|--|------|------|------|------|----|
| LOG13                            | cc-cv-dg | 105  | 46   | 173 | 77 |      |      |      |     | 8 | bdl  |      | bdl |  |      |      |      |      | 11 |
| TP4B                             | cp       | 948  | 442  | bdl |    |      |      |      |     | 8 | 723  | 205  | bdl |  |      |      |      |      | 28 |
| TP4B                             | is       | 4677 | 1862 | bdl |    |      |      |      |     | 8 | 3729 | 1752 | bdl |  |      |      |      |      | 24 |
| Zn phases from all sites: Cd, Sb |          |      |      |     |    |      |      |      |     |   |      |      |     |  |      |      |      |      |    |
| TAG47                            | sp       |      |      |     |    | 1967 | 571  | 10   | 10  | 7 |      |      |     |  | 2643 | 1648 | bdl  |      | 7  |
| TAGH                             | sp       |      |      |     |    | 784  | 318  | 24   | 19  | 3 |      |      |     |  | 522  | 346  | bdl  |      | 20 |
| LOG11                            | sp       | 2706 | 242  | bdl |    | 1222 | 520  | 216  | 87  | 4 | 2791 | 921  |     |  | 1230 | 627  | n/a  |      | 19 |
| TP4B<br>high Fe                  | sp       | 43   | 20   | bdl |    | 1168 | 637  | 157  | 34  | 8 | bdl  |      | bdl |  | 1012 | 782  | 163  | 96   | 25 |
| SEPR                             | sp       |      |      |     |    | 3972 | 2173 | 439  | 479 | 8 |      |      |     |  | 2231 | 1284 | bdl  |      | 73 |
| AS1                              | sp       |      |      |     |    | 1930 | 1713 | 284  | 307 | 7 |      |      |     |  | 2045 | 1634 | bdl  |      | 13 |
| PM2D2                            | sp       |      |      |     |    | 1825 | 485  | 1816 | 829 | 5 |      |      |     |  | n/a  |      | 1747 | 2203 | 23 |
| PM5ETS<br>low Fe                 | sp       |      |      |     |    | 1018 | 751  | 29   | 39  | 8 |      |      |     |  | 973  | 726  | n/a  |      | 23 |
| PM6BTS<br>low Fe                 | sp       |      |      |     |    | 1274 | 913  | 626  | 897 | 9 |      |      |     |  | 1208 | 1026 | 108  | 124  | 30 |
| PM2FTS<br>low Fe                 | sp       |      |      |     |    | 2741 | 802  | 26   | 26  | 5 |      |      |     |  | 1992 | 509  | 25   | 31   | 29 |

**Table S4.** Powder X-ray Diffraction (XRD) set up parameters for sample powders.

|                                |               |                                  |     |                                        |      |
|--------------------------------|---------------|----------------------------------|-----|----------------------------------------|------|
| <b>Anode material</b>          | Cu            | <b>Generator voltage (kV)</b>    | 40  | <b>Start <math>\theta</math></b>       | 10   |
| <b>K-Alpha1</b>                | 1.540598      | <b>Tube current (mA)</b>         | 30  | <b>End <math>\theta</math></b>         | 80   |
| <b>K-Alpha2</b>                | 1.544426      | <b>Fixed Divergence slit (°)</b> | 0.5 | <b>Step size (<math>\theta</math>)</b> | 0.02 |
| <b>Ratio K-Alpha2/K-Alpha1</b> | 0.5           | <b>Antiscatter slit (°)</b>      | 0.5 | <b>Time step (s)</b>                   | 10   |
| <b>Scan axis</b>               | 2 Theta-Omega | <b>Receiving height (mm)</b>     | 0.5 | <b>No. of points</b>                   | 3500 |

**Table S5.** Major element composition of sulfide minerals from EMPA in wt% and 2 sigma standard deviation. N; number of analysis, bdl; below the minimum detection limit, cp (chalcopyrite), py (pyrite), mc (marcasite), is (isocubanite), sp (sphalerite), pyr (pyrrhotite), cv (covellite), cc (chalcocite), bn (bornite), tt-td (tennantite-tetrahedrite), gn (galena)

| Sample                                                                  | Mineral |      | S    |     | Fe   |     | Cu   |     | Zn   |     | Total |
|-------------------------------------------------------------------------|---------|------|------|-----|------|-----|------|-----|------|-----|-------|
|                                                                         |         | N    | mean | SD  | mean | SD  | mean | SD  | mean | SD  | mean  |
| <i>TAG-1 (Central), TAG hydrothermal vent field, Mid-Atlantic Ridge</i> |         |      |      |     |      |     |      |     |      |     |       |
| TAGM                                                                    | cp      | 10.0 | 35.7 | 0.8 | 30.2 | 1.7 | 34.7 | 3.0 | Bdl  | Bdl | 100.6 |
| TAGM                                                                    | py      | 12.0 | 53.6 | 1.2 | 46.3 | 2.6 | 0.0  | 0.0 | Bdl  | Bdl | 99.9  |
| TAGM                                                                    | mc      | 10.0 | 53.6 | 1.3 | 46.3 | 2.6 | 0.0  | 0.0 | Bdl  | Bdl | 10bdl |
| TAG6F                                                                   | cp      | 6.0  | 34.7 | 1.1 | 30.6 | 1.4 | 34.9 | 1.4 | Bdl  | Bdl | 100.3 |
| TAG6F                                                                   | py      | 10.0 | 52.6 | 1.7 | 46.4 | 2.1 | 0.0  | 0.0 | Bdl  | Bdl | 99.1  |
| TAG6F colloform interior                                                | py      | 2.0  | 53.2 | 1.7 | 46.4 | 2.1 | Bdl  | Bdl | Bdl  | Bdl | 99.6  |
| TAG6F colloform exterior                                                | py      | 2.0  | 53.0 | 1.7 | 46.2 | 2.1 | Bdl  | Bdl | Bdl  | Bdl | 99.2  |
| TAG27                                                                   | cp      | 9.0  | 35.0 | 1.1 | 30.3 | 1.4 | 34.8 | 1.4 | Bdl  | Bdl | 100.1 |
| TAG27                                                                   | py      | 4.0  | 51.8 | 1.6 | 46.1 | 2.1 | 0.0  | 0.0 | Bdl  | Bdl | 98.0  |
| <i>TAG-4 (West), TAG hydrothermal vent field, Mid-Atlantic Ridge</i>    |         |      |      |     |      |     |      |     |      |     |       |
| TAG46                                                                   | cp      | 9.0  | 35.1 | 1.1 | 30.1 | 1.4 | 34.8 | 1.4 | Bdl  | Bdl | 100.1 |
| TAG46                                                                   | sp      | 2.0  | 34.2 | 1.2 | 8.2  | 0.4 | 0.4  | 0.0 | 58.5 | 0.8 | 101.5 |
| TAG46                                                                   | py      | 11.0 | 51.9 | 1.7 | 46.3 | 2.1 | 0.0  | 0.0 | 0.0  | 0.0 | 98.3  |
| TAG46                                                                   | mc      | 12.0 | 52.0 | 1.7 | 46.2 | 2.1 | Bdl  | Bdl | 0.0  | 0.0 | 98.2  |
| TAGJ                                                                    | cp      | 21.0 | 35.1 | 0.9 | 30.0 | 1.6 | 34.6 | 2.3 | Bdl  | Bdl | 99.8  |
| TAGJ                                                                    | py      | 13.0 | 53.0 | 1.3 | 46.2 | 2.4 | 0.1  | 0.0 | Bdl  | Bdl | 99.4  |
| TAGJ                                                                    | mc      | 14.0 | 52.5 | 1.3 | 46.3 | 2.6 | 0.1  | 0.0 | 0.0  | 0.0 | 99.0  |
| TAG47                                                                   | sp      | 3.0  | 33.7 | 1.2 | 1.1  | 0.1 | 0.2  | 0.0 | 65.7 | 0.9 | 101.1 |
| TAG47                                                                   | py      | 9.0  | 53.1 | 1.7 | 46.2 | 2.1 | Bdl  | Bdl | 0.0  | 0.0 | 99.4  |
| TAG47                                                                   | mc      | 9.0  | 52.7 | 1.7 | 46.1 | 2.1 | Bdl  | Bdl | 0.0  | 0.0 | 98.9  |
| TAG48                                                                   | sp      | 6.0  | 33.7 | 1.2 | 2.4  | 0.1 | 0.5  | 0.0 | 63.5 | 0.9 | 101.2 |
| TAG48                                                                   | py      | 9.0  | 52.5 | 1.7 | 45.8 | 2.1 | 0.0  | 0.0 | 0.0  | 0.0 | 98.5  |
| TAG48 colloform interior                                                | py      | 5.0  | 51.9 | 1.7 | 45.8 | 2.1 | Bdl  | Bdl | 0.0  | 0.0 | 97.7  |
| TAG48 colloform exterior                                                | py      | 5.0  | 52.3 | 1.7 | 44.4 | 2.0 | 0.2  | 0.0 | 0.0  | 0.0 | 97.0  |
| TAG48                                                                   | mc      | 10.0 | 52.7 | 1.7 | 45.9 | 2.1 | Bdl  | Bdl | 0.0  | 0.0 | 98.7  |
| TAG48 colloform                                                         | mc      | 2.0  | 52.5 | 1.7 | 45.5 | 2.1 | Bdl  | Bdl | Bdl  | Bdl | 98.1  |
| TAGH                                                                    | sp      | 27.0 | 33.5 | 0.9 | 2.0  | 0.1 | 0.2  | 0.0 | 64.8 | 1.1 | 100.4 |
| TAGH                                                                    | py      | 22.0 | 53.2 | 1.3 | 46.4 | 2.4 | Bdl  | Bdl | 0.0  | 0.0 | 99.6  |
| TAGH                                                                    | mc      | 14.0 | 52.7 | 1.4 | 46.4 | 2.6 | Bdl  | Bdl | 0.1  | 0.0 | 99.2  |
| TAGI                                                                    | py      | 13.0 | 52.6 | 1.2 | 45.9 | 2.4 | Bdl  | Bdl | Bdl  | Bdl | 98.5  |
| TAGI colloform                                                          | py      | 8.0  | 50.0 | 1.2 | 44.4 | 2.5 | Bdl  | Bdl | Bdl  | Bdl | 94.5  |
| TAGI                                                                    | mc      | 13.0 | 51.7 | 1.4 | 45.9 | 2.6 | Bdl  | Bdl | 0.0  | 0.0 | 97.7  |
| <i>TAG-5 (North), TAG hydrothermal vent field, Mid-Atlantic Ridge</i>   |         |      |      |     |      |     |      |     |      |     |       |
| TAGK                                                                    | cp      | 17.0 | 35.2 | 0.8 | 29.9 | 1.5 | 34.7 | 2.3 | Bdl  | Bdl | 99.8  |
| TAGK                                                                    | py      | 19.0 | 53.0 | 1.3 | 46.4 | 2.4 | 0.1  | 0.0 | 0.0  | 0.0 | 99.6  |

| Sample                                                                         | Mineral        |      | S    |     | Fe   |     | Cu   |     | Zn   |     | Total |
|--------------------------------------------------------------------------------|----------------|------|------|-----|------|-----|------|-----|------|-----|-------|
|                                                                                |                | N    | mean | SD  | mean | SD  | mean | SD  | mean | SD  | mean  |
| TAGL                                                                           | cp             | 17.0 | 35.3 | 0.8 | 29.9 | 1.5 | 34.8 | 2.3 | Bdl  | Bdl | 100.0 |
| TAGL                                                                           | py             | 14.0 | 53.2 | 1.3 | 46.5 | 2.4 | 0.1  | 0.0 | Bdl  | Bdl | 99.8  |
| <i>Inactive mound, Turtle Pits hydrothermal vent field, Mid-Atlantic Ridge</i> |                |      |      |     |      |     |      |     |      |     |       |
| TP2L                                                                           | cp             | 9.0  | 35.4 | 0.9 | 30.5 | 1.6 | 34.3 | 2.1 | Bdl  | Bdl | 100.1 |
| TP2L                                                                           | py             | 9.0  | 52.8 | 1.2 | 46.0 | 2.3 | 0.1  | 0.0 | Bdl  | Bdl | 99.0  |
| TP2LTS colloform                                                               | py             | 3.0  | 52.3 | 1.2 | 44.5 | 2.5 | 0.3  | 0.0 | 0.0  | 0.0 | 97.1  |
| TP2LTS                                                                         | mc             | 10.0 | 53.2 | 0.2 | 46.0 | 0.0 | 0.1  | 0.0 | Bdl  | Bdl | 99.4  |
| <i>Southern Tower, Turtle Pits hydrothermal vent field, Mid-Atlantic Ridge</i> |                |      |      |     |      |     |      |     |      |     |       |
| TP4B                                                                           | cp             | 30.0 | 35.7 | 1.1 | 31.5 | 1.7 | 33.0 | 2.1 | 0.1  | 0.0 | 100.4 |
| TP4B                                                                           | is             | 26.0 | 36.1 | 1.0 | 38.9 | 2.0 | 23.9 | 1.4 | 0.1  | 0.0 | 99.4  |
| TP4BTS                                                                         | is             | 4.0  | 34.7 | 0.2 | 40.4 | 0.0 | 22.1 | 0.0 | Bdl  | Bdl | 97.3  |
| TP4BTS                                                                         | sp             | 9.0  | 33.3 | 0.2 | 12.2 | 0.0 | 1.0  | 0.0 | 52.0 | 0.1 | 98.7  |
| TP4B                                                                           | sp             | 25.0 | 34.2 | 0.9 | 11.5 | 1.7 | 0.4  | 0.0 | 54.4 | 1.0 | 100.5 |
| TP4B                                                                           | py             | 36.0 | 53.2 | 1.5 | 46.4 | 2.4 | 0.1  | 0.0 | 0.0  | 0.0 | 99.8  |
| TP4B                                                                           | mc             | 11.0 | 53.5 | 1.5 | 46.1 | 2.6 | 0.1  | 0.0 | 0.2  | 0.0 | 100.0 |
| TP4BTS                                                                         | mc             | 22.0 | 52.8 | 0.2 | 46.3 | 0.1 | 0.1  | bdl | 0.0  | 0.0 | 99.3  |
| TP4BTS                                                                         | pyr            | 26.0 | 38.4 | 0.2 | 59.6 | 0.1 | 0.4  | 0.0 | 0.1  | 0.0 | 98.8  |
| TP4B                                                                           | pyr            | 14.0 | 38.8 | 1.1 | 56.5 | 3.1 | 0.3  | 0.0 | 0.1  | 0.0 | 96.6  |
| <i>Irina 1, Logatchev-1 hydrothermal vent field, Mid-Atlantic Ridge</i>        |                |      |      |     |      |     |      |     |      |     |       |
| LOG13                                                                          | cp             | 13.0 | 35.4 | 0.8 | 29.7 | 1.5 | 34.8 | 2.4 | Bdl  | Bdl | 100.0 |
| LOG13                                                                          | sp             | 18.0 | 32.1 | 0.2 | 1.6  | 0.0 | 2.3  | 0.0 | 60.4 | 0.1 | 97.5  |
| LOG13                                                                          | cp(bn)         | 11.0 | 30.4 | 0.9 | 18.0 | 1.0 | 42.1 | 3.0 | 0.0  | 0.0 | 90.8  |
| LOG13TS                                                                        | cv(bn)         | 11.0 | 30.0 | 0.9 | 8.6  | 0.6 | 58.6 | 3.9 | bdl  | bdl | 97.3  |
| <i>Candelaber, Logatchev-1 hydrothermal vent field, Mid-Atlantic Ridge</i>     |                |      |      |     |      |     |      |     |      |     |       |
| LOG11                                                                          | cp             | 13.0 | 35.6 | 0.9 | 30.8 | 1.7 | 33.7 | 2.4 | 0.0  | 0.0 | 100.2 |
| LOG11TS                                                                        | is             | 23.0 | 36.0 | 1.2 | 40.3 | 1.8 | 24.4 | 1.0 | Bdl  | Bdl | 100.8 |
| LOG11                                                                          | is             | 21.0 | 35.7 | 1.0 | 38.8 | 2.1 | 24.4 | 1.5 | 0.1  | 0.0 | 99.5  |
| LOG11                                                                          | sp             | 19.0 | 33.4 | 0.2 | 8.9  | 0.0 | 0.5  | 0.0 | 55.7 | 0.1 | 98.8  |
| LOG11TS                                                                        | bn(cp)         | 25.0 | 32.6 | 1.0 | 14.3 | 0.7 | 54.5 | 2.2 | 0.0  | 0.0 | 101.6 |
| LOG11TS                                                                        | cv-pore spaces | 28.0 | 32.7 | 0.2 | 2.6  | 0.0 | 49.0 | 0.1 | 0.9  | 0.0 | 85.9  |
| <i>16°43'S hydrothermal vent field, East Pacific Rise</i>                      |                |      |      |     |      |     |      |     |      |     |       |
| SEPR                                                                           | cp             | 22.0 | 35.6 | 0.9 | 30.6 | 1.5 | 34.3 | 2.1 | 0.1  | 0.0 | 100.6 |
| SEPRTS                                                                         | cp             | 10.0 | 36.1 | 0.4 | 31.2 | 0.3 | 34.4 | 0.3 | 0.0  | 0.0 | 101.7 |
| SEPR                                                                           | sp             | 2.0  | 34.0 | 0.8 | 4.3  | 0.2 | 0.6  | 0.1 | 60.7 | 0.9 | 100.0 |
| SEPRTS                                                                         | sp             | 73.0 | 32.6 | 0.5 | 1.0  | 0.0 | 1.4  | 0.0 | 63.3 | 0.4 | 99.4  |
| SEPR                                                                           | py             | 16.0 | 53.4 | 1.4 | 46.2 | 2.6 | 0.3  | 0.0 | 0.1  | 0.0 | 10bdl |
| SEPRTS                                                                         | py             | 7.0  | 53.9 | 0.6 | 46.5 | 0.4 | 0.3  | 0.0 | 0.1  | 0.0 | 100.9 |
| SEPR                                                                           | bn-sp          | 14.0 | 30.1 | 0.8 | 7.6  | 0.5 | 53.0 | 4.2 | 1.2  | 0.0 | 92.4  |
| <i>Ashes hydrothermal vent field, Juan de Fuca Ridge*</i>                      |                |      |      |     |      |     |      |     |      |     |       |
| AS1                                                                            | cp             | 19.0 | 35.3 | 0.9 | 31.1 | 1.6 | 33.8 | 2.3 | 0.2  | 0.0 | 100.3 |
| AS1                                                                            | sp             | 13.0 | 33.8 | 0.9 | 11.2 | 2.0 | 3.9  | 0.3 | 51.2 | 1.1 | 100.3 |

| Sample                                                                                   | Mineral |      | S    |     | Fe   |     | Cu   |     | Zn   |     | Total |
|------------------------------------------------------------------------------------------|---------|------|------|-----|------|-----|------|-----|------|-----|-------|
|                                                                                          |         | N    | mean | SD  | mean | SD  | mean | SD  | mean | SD  | mean  |
|                                                                                          |         |      |      |     |      |     |      |     |      |     |       |
| AS1                                                                                      | py      | 26.0 | 52.8 | 1.3 | 46.1 | 2.5 | 0.1  | 0.0 | 0.8  | 0.0 | 100.1 |
| AS1 colloform                                                                            | py      | 30.0 | 52.5 | 1.4 | 45.6 | 2.5 | 0.4  | 0.0 | 0.0  | 0.0 | 98.7  |
| AS1 colloform interior                                                                   | mc      | 7.0  | 53.0 | 1.2 | 46.4 | 2.6 | 0.1  | 0.0 | 0.0  | 0.0 | 99.7  |
| AS1 colloform exterior                                                                   | mc      | 6.0  | 53.3 | 1.2 | 45.7 | 2.5 | 0.2  | 0.0 | 0.0  | 0.0 | 99.6  |
| <i>Roman Ruins, Pacmanus hydrothermal vent field, Pacmanus Basin, Papua New Guinea</i>   |         |      |      |     |      |     |      |     |      |     |       |
| PM2D                                                                                     | sp      | 23.0 | 33.6 | 0.9 | 5.9  | 0.3 | 0.3  | 0.0 | 60.5 | 1.1 | 100.6 |
|                                                                                          |         |      |      |     |      |     |      |     |      |     |       |
| PM2D                                                                                     | py      | 36.0 | 52.7 | 1.3 | 46.4 | 2.3 | Bdl  | Bdl | 0.0  | 0.0 | 99.9  |
| PM2D                                                                                     | mc      | 12.0 | 53.4 | 1.4 | 46.3 | 2.6 | Bdl  | Bdl | 0.0  | 0.0 | 100.2 |
| <i>Satanic Mills, Pacmanus hydrothermal vent field, Pacmanus Basin, Papua New Guinea</i> |         |      |      |     |      |     |      |     |      |     |       |
| PM5E                                                                                     | cp      | 30.0 | 35.5 | 0.8 | 30.0 | 1.4 | 34.9 | 2.0 | 0.0  | 0.0 | 100.8 |
| PM5E                                                                                     | sp      | 3.0  | 32.9 | 0.8 | 2.2  | 0.1 | 2.2  | 0.2 | 60.2 | 0.9 | 100.0 |
| PM5ETS                                                                                   | sp      | 23.0 | 32.8 | 0.2 | 0.5  | 0.0 | 0.4  | 0.0 | 64.2 | 0.1 | 99.3  |
| PM5E colloform                                                                           | py      | 9.0  | 51.6 | 1.6 | 41.6 | 1.9 | 0.7  | 4.2 | 1.8  | 0.0 | 97.5  |
| PM5E                                                                                     | mc      | 19.0 | 53.6 | 1.3 | 46.4 | 2.6 | 0.1  | 0.0 | 0.0  | 0.0 | 100.3 |
| PM5E                                                                                     | tt-td   | 51.0 | 25.1 | 0.7 | 6.0  | 0.3 | 40.7 | 2.1 | 4.0  | 0.1 | 100.8 |
| PM6B                                                                                     | cp      | 19.0 | 35.6 | 0.9 | 29.9 | 1.4 | 34.3 | 1.1 | 0.3  | 0.0 | 100.2 |
| PM6B high Fe                                                                             | sp      | 25.0 | 33.2 | 0.9 | 1.6  | 0.1 | 0.2  | 0.0 | 64.2 | 1.3 | 102.4 |
| PM6B                                                                                     | sp      | 30.0 | 33.2 | 1.0 | 0.7  | 0.1 | 0.1  | 0.0 | 63.7 | 1.4 | 102.6 |
| PM6B                                                                                     | py      | 24.0 | 51.2 | 1.4 | 42.8 | 2.2 | 0.4  | 0.0 | 1.1  | 0.0 | 98.3  |
| PM6B colloform                                                                           | py      | 10.0 | 51.6 | 1.6 | 42.9 | 1.9 | 0.5  | 0.0 | 1.2  | 0.0 | 98.2  |
| PM6B                                                                                     | tt-td   | 9.0  | 26.6 | 0.8 | 2.5  | 0.1 | 39.7 | 1.3 | 8.5  | 0.1 | 100.1 |
| <i>Solwara-8, Pacmanus hydrothermal vent field, Pacmanus Basin, Papua New Guinea</i>     |         |      |      |     |      |     |      |     |      |     |       |
| PM2F                                                                                     | cp      | 25.0 | 35.5 | 0.9 | 29.6 | 1.5 | 35.3 | 2.4 | 0.1  | 0.0 | 101.2 |
| PM2F low Fe                                                                              | sp      | 29.0 | 33.4 | 0.9 | 0.5  | 0.0 | 1.6  | 0.2 | 64.6 | 1.0 | 107.0 |
| PM2F high Fe                                                                             | sp      | 3.0  | 32.7 | 1.1 | 1.5  | 0.1 | 3.6  | 0.2 | 58.9 | 1.4 | 100.0 |
| PM2F                                                                                     | tt-td   | 25.0 | 20.0 | 0.6 | 5.5  | 0.3 | 40.2 | 2.7 | 5.5  | 0.1 | 92.9  |
| PM2F                                                                                     | bn      | 9.0  | 28.0 | 0.7 | 7.0  | 0.4 | 63.3 | 5.1 | 0.4  | 0.0 | 99.6  |
| PM2F2                                                                                    | cv      | 10.0 | 28.5 | 0.7 | 3.9  | 0.2 | 69.1 | 5.9 | 0.1  | 0.0 | 101.8 |
| <i>Palinuro Volcanic Complex, Aeolian Island Arc, Italy</i>                              |         |      |      |     |      |     |      |     |      |     |       |
| PVC851                                                                                   | sp      | 7.0  | 33.4 | 0.8 | 0.3  | 0.0 | 0.1  | 0.0 | 64.9 | 0.7 | 101.5 |
| PVC932                                                                                   | py      | 6.0  | 54.9 | 1.2 | 44.2 | 0.6 | Bdl  | Bdl | Bdl  | Bdl | 100.0 |
| PVC932                                                                                   | tt-td   | 6.0  | 26.9 | 0.6 | 3.5  | 0.1 | 39.4 | 0.3 | 4.0  | 0.1 | 100.0 |
|                                                                                          |         |      | S    |     | Fe   |     | Pb   |     | Zn   |     | Total |
| Sample                                                                                   |         | N    | mean | SD  | mean | SD  | mean | SD  | mean | SD  | mean  |
| <i>Satanic Mills, Pacmanus hydrothermal vent field, Pacmanus Basin, Papua New Guinea</i> |         |      |      |     |      |     |      |     |      |     |       |
| PM2D                                                                                     | gn      | 5.0  | 13.9 | 0.3 | 0.1  | 0.0 | 84.3 | 0.8 | 0.6  | 0.0 | 100.6 |
| PM2D Hg*                                                                                 | gn      | 19.0 | 13.6 | 0.3 | 0.1  | bdl | 83.7 | 0.8 | 1.1  | 0.0 | 100.0 |
| <i>Roman Ruins, Pacmanus hydrothermal vent field, Pacmanus Basin, Papua New Guinea</i>   |         |      |      |     |      |     |      |     |      |     |       |
| PM6B Hg*                                                                                 | gn      | 12.0 | 13.8 | 0.3 | 0.0  | bdl | 86.0 | 0.8 | 0.5  | 0.0 | 101.3 |

| Sample                                                      | Mineral |      | S    |     | Fe   |     | Cu   |     | Zn   |     | Total |
|-------------------------------------------------------------|---------|------|------|-----|------|-----|------|-----|------|-----|-------|
|                                                             |         | N    | mean | SD  | mean | SD  | mean | SD  | mean | SD  | mean  |
| <i>Palinuro Volcanic Complex, Aeolian Island Arc, Italy</i> |         |      |      |     |      |     |      |     |      |     |       |
| PVC932 Hg*                                                  | gn      | 19.0 | 13.8 | 0.3 | 0.1  | bdl | 86.4 | 0.8 | 0.0  | 0.0 | 100.7 |
| PVC851 Hg*                                                  | gn      | 28.0 | 14.0 | 0.3 | 0.0  | bdl | 84.7 | 0.8 | 0.8  | 0.0 | 100.8 |

**Table S6** Trace element distributions in a range of sulfide minerals in massive sulfides from LA-ICP-MS in ppm and 1 sigma error. N;number of analysis bdl; below the minimum detection limit

|                                                                                   |   | Ag   |       | As   |      | Bi     |        | Cd   |      | Co     |        | Mn   |       | Ni   |      | Pb    |      | Sb    |       | Cu   |      | Zn     |       | Fe     |      | Hg   |    |
|-----------------------------------------------------------------------------------|---|------|-------|------|------|--------|--------|------|------|--------|--------|------|-------|------|------|-------|------|-------|-------|------|------|--------|-------|--------|------|------|----|
| Sample                                                                            | N | mean | SD    | mean | SD   | mean   | SD     | mean | SD   | mean   | SD     | mean | SD    | mean | SD   | mean  | SD   | mean  | SD    | mean | SD   | mean   | SD    | mean   | SD   | mean | SD |
| SPHALERITE (90)                                                                   |   |      |       |      |      |        |        |      |      |        |        |      |       |      |      |       |      |       |       |      |      |        |       |        |      |      |    |
| TAG-4 (West), TAG hydrothermal vent field, Mid-Atlantic Ridge                     |   |      |       |      |      |        |        |      |      |        |        |      |       |      |      |       |      |       |       |      |      |        |       |        |      |      |    |
| TAG47 porous                                                                      | 7 | 38.7 | 5.31  | 63.3 | 7.14 | Bdl    | Bdl    | 1740 | 182  | Bdl    | bdl    | 10.7 | 0.808 | Bdl  | bdl  | 83    | 22.1 | 9.08  | 1.39  | 2020 | 276  | 657000 | 84000 | 6890   | 1010 |      |    |
| TAGH massive                                                                      | 3 | 55.9 | 2.68  | 93.2 | 3.43 | Bdl    | bdl    | 669  | 23.1 | 17.8   | 0.927  | 8.12 | 0.204 | Bdl  | bdl  | 181   | 6.05 | 20.5  | 1.31  | 1470 | 28.8 | 648000 | 16100 | 6800   | 261  |      |    |
| Southern Tower, Turtle Pits hydrothermal vent field, Mid-Atlantic Ridge           |   |      |       |      |      |        |        |      |      |        |        |      |       |      |      |       |      |       |       |      |      |        |       |        |      |      |    |
| TP4BTS colloform                                                                  | 4 | 8.19 | 1.11  | 129  | 18.6 | Bdl    | bdl    | 892  | 80.5 | 1090   | 44.9   | 52.1 | 2.89  | Bdl  | bdl  | 332   | 37.9 | 146   | 12.1  | 3660 | 646  | 520000 | 33800 | 82600  | 2910 |      |    |
| TP4B colloform                                                                    | 8 | 236  | 16.9  | 105  | 6.05 | Bdl    | bdl    | 966  | 46.2 | 35.3   | 1.96   | 57.3 | 1.71  | Bdl  | bdl  | 595   | 37.6 | 129   | 4.92  | 2360 | 115  | 544000 | 23800 | 77200  | 4330 |      |    |
| Candelaber, Logatchev-1 hydrothermal vent field, Mid-Atlantic Ridge               |   |      |       |      |      |        |        |      |      |        |        |      |       |      |      |       |      |       |       |      |      |        |       |        |      |      |    |
| LOG11 massive                                                                     | 4 | 15.1 | 1.25  | 98.4 | 10.2 | Bdl    | bdl    | 1010 | 87.4 | 2220   | 139    | 40   | 2.37  | Bdl  | Bdl  | 284   | 29.6 | 178   | 15.2  | 3690 | 209  | 557000 | 25200 | 61800  | 3400 |      |    |
| 16°43'S hydrothermal vent field, East Pacific Rise                                |   |      |       |      |      |        |        |      |      |        |        |      |       |      |      |       |      |       |       |      |      |        |       |        |      |      |    |
| SEPR colloform                                                                    | 4 | 252  | 9.95  | 207  | 13.5 | Bdl    | bdl    | 1840 | 84.7 | 105    | 3.67   | 8.12 | 0.512 | bdl  | bdl  | 2730  | 110  | 26    | 1.7   | 9120 | 339  | 633000 | 25900 | 5970   | 319  |      |    |
| SEPR massive                                                                      | 4 | 15.5 | 1.8   | 8.55 | 3.99 | Bdl    | bdl    | 4900 | 296  | 430    | 23.4   | 20.2 | 1.91  | Bdl  | bdl  | 45.3  | 7.71 | 724   | 53.6  | 4320 | 298  | 633000 | 25200 | 27700  | 1400 |      |    |
| Ashes hydrothermal vent field, Juan de Fuca Ridge*                                |   |      |       |      |      |        |        |      |      |        |        |      |       |      |      |       |      |       |       |      |      |        |       |        |      |      |    |
| AS1TS massive                                                                     | 3 | 2.6  | 0.359 | 3.5  | 1.46 | 0.0695 | 0.0346 | 3080 | 259  | 141    | 10.5   | 556  | 40    | 3.21 | 4.35 | 5.67  | 1.05 | 51.6  | 7.58  | 3050 | 700  | 801000 | 63200 | 101000 | 7560 |      |    |
| AS1TS massive                                                                     | 4 | 12.5 | 1.26  | 720  | 56.4 | 0.0507 | 0.0531 | 850  | 68.3 | 18.5   | 1.71   | 490  | 35.9  | bdl  | bdl  | 1710  | 145  | 690   | 51.4  | 6150 | 458  | 771000 | 59600 | 101000 | 7610 |      |    |
| Roman Ruins, Pacmanus hydrothermal vent field, Pacmanus Basin, Papua New Guinea   |   |      |       |      |      |        |        |      |      |        |        |      |       |      |      |       |      |       |       |      |      |        |       |        |      |      |    |
| PM2D2 colloform                                                                   | 5 | 486  | 37.5  | 273  | 21.6 | bdl    | bdl    | 1650 | 53.6 | 0.165  | 0.0962 | 182  | 3.31  | bdl  | bdl  | 789   | 50.4 | 1630  | 88.6  | 3040 | 126  | 605000 | 21000 | 68100  | 2640 |      |    |
| PM2D colloform                                                                    | 1 | 392  | 14.6  | 366  | 17.6 | bdl    | bdl    | 87.7 | 3.08 | 0.339  | 0.113  | 99.7 | 2.09  | bdl  | bdl  | 1020  | 49.3 | 520   | 39.2  | 794  | 48.1 | 605000 | 12300 | 29700  | 979  |      |    |
| Satanic Mills, Pacmanus hydrothermal vent field, Pacmanus Basin, Papua New Guinea |   |      |       |      |      |        |        |      |      |        |        |      |       |      |      |       |      |       |       |      |      |        |       |        |      |      |    |
| PM5E colloform                                                                    | 3 | 47.4 | 7.35  | 2760 | 135  | 0.156  | 0.0679 | 2730 | 182  | bdl    | bdl    | 38   | 1.62  | bdl  | bdl  | 6190  | 275  | 0.534 | 0.396 | 644  | 96.3 | 602000 | 27400 | 1960   | 146  |      |    |
| PM5E2 colloform                                                                   | 1 | 52.8 | 1.73  | 3070 | 87.9 | bdl    | bdl    | 4700 | 198  | bdl    | bdl    | 44.3 | 0.968 | bdl  | bdl  | 7060  | 255  | 19.5  | 1.82  | 4570 | 487  | 602000 | 16700 | 6190   | 456  |      |    |
| PM5ETS colloform                                                                  | 8 | 23.2 | 2.97  | 4350 | 258  | bdl    | bdl    | 869  | 75.3 | 0.0261 | 0.0795 | 42.3 | 1.46  | bdl  | bdl  | 9070  | 544  | 24.7  | 5.38  | 938  | 203  | 642000 | 17900 | 2480   | 429  |      |    |
| PM6B TS colloform                                                                 | 9 | 203  | 15.8  | 5820 | 312  | bdl    | bdl    | 1110 | 86.1 | bdl    | bdl    | 99.6 | 3.35  | bdl  | bdl  | 17900 | 928  | 553   | 44.2  | 923  | 91.7 | 637000 | 20000 | 4610   | 279  |      |    |

|                                                                               |   | Ag    |       | As    |       | Bi      |        | Cd    |       | Co     |        | Mn    |       | Ni   |     | Pb    |       | Sb     |        | Cu     |       | Zn     |       | Fe     |       | Hg   |     |
|-------------------------------------------------------------------------------|---|-------|-------|-------|-------|---------|--------|-------|-------|--------|--------|-------|-------|------|-----|-------|-------|--------|--------|--------|-------|--------|-------|--------|-------|------|-----|
| Sample                                                                        | N | mean  | SD    | mean  | SD    | mean    | SD     | mean  | SD    | mean   | SD     | mean  | SD    | mean | SD  | mean  | SD    | mean   | SD     | mean   | SD    | mean   | SD    | mean   | SD    | mean | SD  |
| PM6B low Fe colloform                                                         | 3 | 407   | 14.9  | 3410  | 83.6  | bdl     | bdl    | 1790  | 64.6  | bdl    | bdl    | 108   | 2.33  | bdl  | bdl | 10700 | 300   | 451    | 24.2   | 1940   | 113   | 637000 | 15000 | 6760   | 238   |      |     |
| PM6B2 low fe colloform                                                        | 3 | 119   | 11.8  | 4740  | 200   | bdl     | bdl    | 953   | 64.6  | 0.0236 | 0.0418 | 92    | 2.08  | bdl  | bdl | 14300 | 653   | 59     | 3.47   | 384    | 34.8  | 637000 | 14900 | 4950   | 296   |      |     |
| Solwara-8, Pacmanus hydrothermal vent field, Pacmanus Basin, Papua New Guinea |   |       |       |       |       |         |        |       |       |        |        |       |       |      |     |       |       |        |        |        |       |        |       |        |       |      |     |
| PM2F2 low Fe massive                                                          | 4 | 19.8  | 1.04  | 3500  | 187   | bdl     | bdl    | 1930  | 91.9  | 0.102  | 0.0787 | 64    | 2.61  | bdl  | bdl | 2810  | 131   | 11.6   | 0.79   | 10200  | 551   | 646000 | 21300 | 3290   | 165   |      |     |
| PM2F low Fe massive                                                           | 5 | 131   | 3.18  | 4510  | 135   | bdl     | bdl    | 2400  | 133   | 0.0226 | 0.0416 | 38.7  | 1.21  | bdl  | bdl | 7010  | 290   | 22.5   | 1.08   | 14500  | 559   | 646000 | 14400 | 4060   | 337   |      |     |
| Palinuro Volcanic Complex, Aeolian Island Arc, Italy                          |   |       |       |       |       |         |        |       |       |        |        |       |       |      |     |       |       |        |        |        |       |        |       |        |       |      |     |
| PVC851                                                                        | 5 | 1.06  | 0.148 | 3360  | 71.8  | 0.117   | 0.0214 | 3840  | 88    | bdl    | bdl    | 24.2  | 0.612 | bdl  | bdl | 14100 | 508   | 30.7   | 1.36   | 787    | 20.4  | 649000 | 12100 | 2720   | 130   | 1790 | 103 |
| CHALCOPYRITE (140)                                                            |   |       |       |       |       |         |        |       |       |        |        |       |       |      |     |       |       |        |        |        |       |        |       |        |       |      |     |
| TAG-1 (Central), TAG hydrothermal vent field, Mid-Atlantic Ridge              |   |       |       |       |       |         |        |       |       |        |        |       |       |      |     |       |       |        |        |        |       |        |       |        |       |      |     |
| TAGM porous                                                                   | 8 | 1.86  | 0.328 | 1.98  | 1.38  | 0.0797  | 0.0372 | 0.361 | 0.355 | 88.8   | 6.08   | 1.75  | 0.538 | bdl  | bdl | 0.322 | 0.115 | 0.181  | 0.125  | 347000 | 14300 | 45.7   | 4.74  | 323000 | 14500 |      |     |
| TAG6F porous                                                                  | 8 | 4.83  | 1.72  | 0.819 | 1.15  | 0.00872 | 0.0114 | 0.397 | 0.643 | 18.5   | 8.72   | 1.17  | 0.557 | bdl  | bdl | 1.75  | 0.688 | 0.0501 | 0.0776 | 349000 | 41100 | 415    | 48.5  | 298000 | 36900 |      |     |
| TAG-4 (West), TAG hydrothermal vent field, Mid-Atlantic Ridge                 |   |       |       |       |       |         |        |       |       |        |        |       |       |      |     |       |       |        |        |        |       |        |       |        |       |      |     |
| TA46 porous                                                                   | 8 | 18.1  | 4.68  | 0.897 | 1.12  | 0.0209  | 0.0364 | 3.73  | 1.6   | 0.373  | 0.267  | 0.66  | 0.361 | bdl  | bdl | 3.52  | 1.5   | 1.3    | 0.435  | 348000 | 42700 | 1010   | 409   | 301000 | 38200 |      |     |
| TAGJ porous                                                                   | 5 | 24.1  | 0.988 | 0.589 | 0.507 | 0.0638  | 0.0519 | 3.29  | 0.755 | 0.228  | 0.191  | 0.373 | 0.269 | bdl  | bdl | bdl   | bdl   | 0.16   | 0.111  | 346000 | 8710  | 34.2   | 2.96  | 274000 | 10900 |      |     |
| TAG-5 (North), TAG hydrothermal vent field, Mid-Atlantic Ridge                |   |       |       |       |       |         |        |       |       |        |        |       |       |      |     |       |       |        |        |        |       |        |       |        |       |      |     |
| TAGK massive                                                                  | 7 | 0.799 | 26.3  | 0.258 | 24.2  | 0.0127  | 16.8   | 0.426 | 33    | 1.12   | 14.3   | 0.28  | 47.6  | bdl  | bdl | bdl   | bdl   | 0.145  | 46.4   | 347000 | 5490  | 7.62   | 21.6  | 275000 | 4370  |      |     |
| TAGL massive                                                                  | 8 | 0.628 | 0.127 | bdl   | bdl   | 0.0391  | 0.0211 | 0.183 | 0.255 | 0.101  | 0.13   | 0.123 | 0.158 | bdl  | bdl | bdl   | bdl   | 0.048  | 0.0594 | 348000 | 9440  | 4.83   | 1.56  | 267000 | 10400 |      |     |
| Inactive mound, Turtle Pits hydrothermal vent field, Mid-Atlantic Ridge       |   |       |       |       |       |         |        |       |       |        |        |       |       |      |     |       |       |        |        |        |       |        |       |        |       |      |     |
| TP2L massive                                                                  | 5 | 16.1  | 0.702 | 0.714 | 0.933 | 0.0186  | 0.0179 | 0.743 | 0.493 | 54.6   | 1.76   | 2.03  | 0.401 | bdl  | bdl | bdl   | bdl   | 0.085  | 0.103  | 343000 | 10800 | 152    | 7.49  | 288000 | 11600 |      |     |
| TP2LTS massive                                                                | 5 | 13.4  | 1.27  | 1.52  | 2.1   | 0.013   | 0.0211 | 1.47  | 2.11  | 65     | 3.35   | 3.03  | 1.08  | bdl  | bdl | 30.2  | 15.9  | 0.401  | 0.472  | 343000 | 12100 | 146    | 17.1  | 283000 | 14000 |      |     |
| Southern Tower, Turtle Pits hydrothermal vent field, Mid-Atlantic Ridge       |   |       |       |       |       |         |        |       |       |        |        |       |       |      |     |       |       |        |        |        |       |        |       |        |       |      |     |
| TP4BTS colloform                                                              | 8 | 11.2  | 1.17  | bdl   | bdl   | 3.63    | 0.867  | 5.53  | 2.43  | 895    | 56.8   | 2.85  | 0.934 | bdl  | bdl | 1.79  | 0.706 | 0.287  | 0.249  | 330000 | 11100 | 2850   | 274   | 282000 | 12600 |      |     |
| TP4B colloform                                                                | 4 | 8.91  | 0.486 | 1.23  | 1.06  | 0.899   | 0.129  | 2.42  | 0.74  | 1130   | 29.4   | 7.75  | 0.438 | bdl  | bdl | 6.19  | 0.949 | 0.389  | 0.159  | 330000 | 7340  | 801    | 30.7  | 313000 | 12500 |      |     |
| Candelaber, Logatchev-1 hydrothermal vent field, Mid-Atlantic Ridge           |   |       |       |       |       |         |        |       |       |        |        |       |       |      |     |       |       |        |        |        |       |        |       |        |       |      |     |



|                                                                                   |    | Ag    |       | As    |      | Bi     |        | Cd    |       | Co    |       | Mn    |       | Ni   |      | Pb    |        | Sb    |        | Cu     |       | Zn   |      | Fe     |       | Hg   |     |
|-----------------------------------------------------------------------------------|----|-------|-------|-------|------|--------|--------|-------|-------|-------|-------|-------|-------|------|------|-------|--------|-------|--------|--------|-------|------|------|--------|-------|------|-----|
| Sample                                                                            | N  | mean  | SD    | mean  | SD   | mean   | SD     | mean  | SD    | mean  | SD    | mean  | SD    | mean | SD   | mean  | SD     | mean  | SD     | mean   | SD    | mean | SD   | mean   | SD    | mean | SD  |
| LOG11TS<br>massive                                                                | 1  | 0.267 | 0.254 | bdl   | bdl  | bdl    | bdl    | 5.27  | 2.11  | 534   | 18.2  | 1.37  | 0.869 | 80.2 | 23.1 | bdl   | bdl    | 0.561 | 0.388  | 337000 | 11600 | 712  | 36.7 | 273000 | 14400 |      |     |
| LOG11<br>massive                                                                  | 21 | 8.33  | 0.652 | 3.03  | 2.28 | 1.59   | 0.259  | 2.67  | 1.13  | 976   | 30.5  | 0.716 | 0.378 | 241  | 14.2 | 2.56  | 0.502  | 0.735 | 0.257  | 337000 | 10500 | 562  | 31.5 | 280000 | 13900 |      |     |
| Irina 1, Logatchev-1 hydrothermal vent field, Mid-Atlantic Ridge                  |    |       |       |       |      |        |        |       |       |       |       |       |       |      |      |       |        |       |        |        |       |      |      |        |       |      |     |
| LOG13TS<br>massive                                                                | 2  | 1.35  | 0.369 | 3.13  | 2.52 | 2.43   | 0.569  | bdl   | bdl   | 108   | 5.09  | 1.05  | 0.721 | 49.9 | 23.6 | 1.01  | 0.439  | bdl   | bdl    | 348000 | 12600 | 107  | 10.9 | 278000 | 17700 |      |     |
| LOG13<br>massive                                                                  | 7  | 0.732 | 0.157 | bdl   | bdl  | 1.72   | 0.203  | 0.536 | 0.438 | 182   | 5.42  | 2.34  | 0.359 | 23.5 | 5.35 | 0.506 | 0.0981 | bdl   | bdl    | 348000 | 9340  | 126  | 10.2 | 283000 | 12200 |      |     |
| 16°43'S hydrothermal vent field, East Pacific Rise                                |    |       |       |       |      |        |        |       |       |       |       |       |       |      |      |       |        |       |        |        |       |      |      |        |       |      |     |
| SEPR<br>massive                                                                   | 5  | 63.9  | 2.39  | 14.2  | 1.83 | 0.0575 | 0.0439 | 1.18  | 0.967 | 56.2  | 2.3   | 1     | 0.499 | 3.46 | 4.67 | 8.04  | 0.897  | 0.455 | 0.226  | 343000 | 10100 | 217  | 18   | 282000 | 13600 |      |     |
| Ashes hydrothermal vent field, Juan de Fuca Ridge*                                |    |       |       |       |      |        |        |       |       |       |       |       |       |      |      |       |        |       |        |        |       |      |      |        |       |      |     |
| AS1<br>massive                                                                    | 8  | 20.5  | 1.09  | 5.2   | 2.49 | 0.0283 | 0.0271 | 13.9  | 1.99  | 25.1  | 1.42  | 26.6  | 5.77  | 3.77 | 4.25 | 3.67  | 1.82   | 0.155 | 0.0868 | 338000 | 9980  | 3870 | 186  | 305000 | 15300 |      |     |
| Satanic Mills, Pacmanus hydrothermal vent field, Pacmanus Basin, Papua New Guinea |    |       |       |       |      |        |        |       |       |       |       |       |       |      |      |       |        |       |        |        |       |      |      |        |       |      |     |
| PM5E2<br>colloform                                                                | 2  | 55.3  | 1.91  | 2600  | 86.4 | 19.9   | 0.777  | 0.43  | 0.471 | 0.151 | 0.163 | 0.869 | 0.401 | bdl  | bdl  | 127   | 4.67   | 1840  | 48.3   | 349000 | 8070  | 137  | 7.73 | 288000 | 9930  |      |     |
| PM5ETS<br>colloform                                                               | 8  | 75.3  | 3.83  | 4230  | 247  | 8.69   | 0.821  | bdl   | bdl   | 0.14  | 0.217 | 0.618 | 0.573 | bdl  | bdl  | 155   | 16.8   | 2320  | 107    | 349000 | 11200 | 138  | 24.5 | 273000 | 11300 |      |     |
| PM5E<br>colloform                                                                 | 3  | 25.6  | 0.932 | 1250  | 38.7 | 34.2   | 1.67   | 0.799 | 0.49  | bdl   | bdl   | 0.468 | 0.289 | bdl  | bdl  | 69.3  | 2.29   | 1060  | 32.5   | 349000 | 7770  | 62.9 | 4.52 | 272000 | 10600 |      |     |
| PM6B2<br>colloform                                                                | 2  | 101   | 3.51  | 3250  | 119  | 62.9   | 1.69   | 1.84  | 1.06  | bdl   | bdl   | 0.893 | 0.411 | bdl  | bdl  | 463   | 13.3   | 3280  | 94.8   | 342000 | 7660  | 310  | 15.6 | 266000 | 10400 |      |     |
| PM6B<br>colloform                                                                 | 5  | 111   | 2.96  | 1310  | 70.9 | 27.5   | 1.46   | 2.12  | 0.808 | 0.11  | 0.151 | 0.471 | 0.278 | bdl  | bdl  | 128   | 5.53   | 1810  | 84.9   | 342000 | 7800  | 286  | 13.9 | 271000 | 9710  |      |     |
| Solwara-8, Pacmanus hydrothermal vent field, Pacmanus Basin, Papua New Guinea     |    |       |       |       |      |        |        |       |       |       |       |       |       |      |      |       |        |       |        |        |       |      |      |        |       |      |     |
| PM2F2<br>massive                                                                  | 4  | 40.6  | 2.26  | 3170  | 170  | 0.0373 | 0.0216 | 3.79  | 1.45  | bdl   | bdl   | 1.06  | 0.554 | bdl  | bdl  | 248   | 11.9   | 220   | 12.1   | 353000 | 9690  | 334  | 17.3 | 269000 | 12200 |      |     |
| PM2F<br>massive                                                                   | 1  | 13.5  | 0.898 | 4730  | 166  | bdl    | bdl    | bdl   | bdl   | 0.635 | 0.287 | 0.444 | 0.39  | bdl  | bdl  | 263   | 7.88   | 53.2  | 2.14   | 353000 | 10100 | 410  | 17.7 | 270000 | 12800 |      |     |
| Palinuro Volcanic Complex, Aeolian Island Arc, Italy                              |    |       |       |       |      |        |        |       |       |       |       |       |       |      |      |       |        |       |        |        |       |      |      |        |       |      |     |
| PVC932                                                                            | 7  | 8.72  | 0.632 | 130   | 28.4 | bdl    | bdl    | 16.8  | 2.67  | bdl   | bdl   | 4.07  | 1.85  | 12.5 | 9.64 | 591   | 76.4   | 176   | 8.63   | 326000 | 8200  | 1330 | 117  | 258000 | 11400 | 44.6 | 6.1 |
| ISOCUBANITE (22)                                                                  |    |       |       |       |      |        |        |       |       |       |       |       |       |      |      |       |        |       |        |        |       |      |      |        |       |      |     |
| Southern Tower, Turtle Pits hydrothermal vent field, Mid-Atlantic Ridge           |    |       |       |       |      |        |        |       |       |       |       |       |       |      |      |       |        |       |        |        |       |      |      |        |       |      |     |
| TP4B                                                                              | 5  | 9.74  | 1.77  | 0.979 | 0.82 | 0.0405 | 0.0329 | 7.04  | 2.11  | 3490  | 180   | 19.7  | 1.58  | 13.7 | 14.9 | 6.63  | 2.31   | 0.414 | 0.382  | 257000 | 13000 | 1750 | 245  | 379000 | 21800 |      |     |
| TP4BTS                                                                            | 3  | 36.8  | 2.05  | 3.61  | 3.38 | 0.0339 | 0.0584 | 3.22  | 1.85  | 6520  | 173   | 11.5  | 1.21  | bdl  | bdl  | 0.238 | 0.315  | bdl   | bdl    | 269000 | 6880  | 2060 | 87   | 380000 | 11000 |      |     |
| Candelaber, Logatchev-1 hydrothermal vent field, Mid-Atlantic Ridge               |    |       |       |       |      |        |        |       |       |       |       |       |       |      |      |       |        |       |        |        |       |      |      |        |       |      |     |

|                                                                               |   | Ag    |        | As    |      | Bi     |        | Cd     |        | Co   |       | Mn    |       | Ni   |      | Pb      |        | Sb     |        | Cu     |       | Zn     |       | Fe     |       | Hg   |    |
|-------------------------------------------------------------------------------|---|-------|--------|-------|------|--------|--------|--------|--------|------|-------|-------|-------|------|------|---------|--------|--------|--------|--------|-------|--------|-------|--------|-------|------|----|
| Sample                                                                        | N | mean  | SD     | mean  | SD   | mean   | SD     | mean   | SD     | mean | SD    | mean  | SD    | mean | SD   | mean    | SD     | mean   | SD     | mean   | SD    | mean   | SD    | mean   | SD    | mean | SD |
| LOG11TS                                                                       | 2 | bdl   | bdl    | bdl   | bdl  | bdl    | bdl    | bdl    | bdl    | 11.5 | 1.53  | 3.68  | 1.19  | 70.2 | 29.3 | 0.691   | 0.354  | 0.632  | 0.402  | 276000 | 9480  | 71.4   | 12.7  | 375000 | 18900 |      |    |
| LOG11                                                                         | 8 | 23.7  | 0.821  | 0.259 | 0.53 | 1.01   | 0.0912 | 7.14   | 0.957  | 3840 | 99.1  | 4.5   | 0.394 | 350  | 12.6 | 0.00855 | 0.0211 | 0.0575 | 0.0582 | 296000 | 7290  | 1190   | 35.2  | 375000 | 15200 |      |    |
| BORNITE (40)                                                                  |   |       |        |       |      |        |        |        |        |      |       |       |       |      |      |         |        |        |        |        |       |        |       |        |       |      |    |
| Candelaber, Logatchev-1 hydrothermal vent field, Mid-Atlantic Ridge           |   |       |        |       |      |        |        |        |        |      |       |       |       |      |      |         |        |        |        |        |       |        |       |        |       |      |    |
| LOG11TS bn-cp                                                                 | 9 | 33.8  | 2.22   | 15.6  | 4.67 | 3.69   | 0.457  | 6.52   | 2.47   | 1490 | 436   | 5.1   | 1.02  | 796  | 115  | 33.7    | 3.12   | 1.2    | 0.486  | 556000 | 17800 | 2360   | 262   | 116000 | 5290  |      |    |
| Irina 1, Logatchev-1 hydrothermal vent field, Mid-Atlantic Ridge              |   |       |        |       |      |        |        |        |        |      |       |       |       |      |      |         |        |        |        |        |       |        |       |        |       |      |    |
| LOG13TS                                                                       | 6 | 38.1  | 2.87   | 14.7  | 7.44 | 3.79   | 0.647  | 7.36   | 4.15   | 27.5 | 3.87  | 6.52  | 1.78  | 58   | 34.2 | 108     | 16.7   | 1.08   | 0.626  | 538000 | 7910  | 1710   | 253   | 116000 | 7770  |      |    |
| LOG13                                                                         | 2 | 47.4  | 2.11   | 2     | 1.32 | 0.0639 | 0.0326 | 0.207  | 0.275  | 7.87 | 0.557 | 2.04  | 0.356 | 8.19 | 4.77 | 7.38    | 0.597  | 0.121  | 0.126  | 421000 | 11500 | 175    | 11.1  | 89400  | 4430  |      |    |
| 16°43'S hydrothermal vent field, East Pacific Rise                            |   |       |        |       |      |        |        |        |        |      |       |       |       |      |      |         |        |        |        |        |       |        |       |        |       |      |    |
| SEPR                                                                          |   |       |        |       |      |        |        |        |        |      |       |       |       |      |      |         |        |        |        |        |       |        |       |        |       |      |    |
| intergrown sp-bn-cv                                                           | 5 | 548   | 27.2   | 28.7  | 3.14 | 0.022  | 0.0206 | 2260   | 229    | 373  | 43.9  | 31.7  | 3.1   | 1.2  | 2.56 | 162     | 8.63   | 156    | 10.1   | 293000 | 9060  | 250000 | 25200 | 148000 | 9590  |      |    |
| Solwara-8, Pacmanus hydrothermal vent field, Pacmanus Basin, Papua New Guinea |   |       |        |       |      |        |        |        |        |      |       |       |       |      |      |         |        |        |        |        |       |        |       |        |       |      |    |
| PM2F2 bn-cp                                                                   | 7 | 245   | 8.58   | 69.3  | 8.91 | bdl    | bdl    | 5.27   | 1.16   | bdl  | bdl   | 5.62  | 0.935 | 4.24 | 3.93 | 73.7    | 3.93   | 10.2   | 1.23   | 562000 | 10100 | 282    | 19.8  | 114000 | 4960  |      |    |
| PM2F bn-cp                                                                    | 2 | 467   | 16.1   | 821   | 43.6 | bdl    | bdl    | 34.6   | 2.88   | bdl  | bdl   | 49    | 2.56  | bdl  | bdl  | 830     | 33.9   | 43     | 1.93   | 562000 | 10300 | 6240   | 389   | 110000 | 4770  |      |    |
| PM2FTS                                                                        |   |       |        |       |      |        |        |        |        |      |       |       |       |      |      |         |        |        |        |        |       |        |       |        |       |      |    |
| intergrown bn-cp                                                              | 9 | 395   | 19.5   | 1160  | 125  | bdl    | bdl    | 33.3   | 5.71   | bdl  | bdl   | 71.3  | 6.71  | 5.06 | 9.45 | 2070    | 136    | 88.9   | 13.9   | 562000 | 11600 | 8240   | 594   | 133000 | 9220  |      |    |
| COVELLITE-CHALCOCITE (25)                                                     |   |       |        |       |      |        |        |        |        |      |       |       |       |      |      |         |        |        |        |        |       |        |       |        |       |      |    |
| Candelaber, Logatchev-1 hydrothermal vent field, Mid-Atlantic Ridge           |   |       |        |       |      |        |        |        |        |      |       |       |       |      |      |         |        |        |        |        |       |        |       |        |       |      |    |
| LOG11TS                                                                       | 8 | 8.32  | 1.49   | 7.09  | 2.41 | 1.2    | 0.166  | 174    | 10.9   | 4410 | 255   | 18.8  | 1.14  | 2680 | 149  | 513     | 122    | 9.31   | 2.48   | 697000 | 11000 | 17100  | 877   | 26200  | 1410  |      |    |
| Irina 1, Logatchev-1 hydrothermal vent field, Mid-Atlantic Ridge              |   |       |        |       |      |        |        |        |        |      |       |       |       |      |      |         |        |        |        |        |       |        |       |        |       |      |    |
| LOG13TS                                                                       | 8 | 70.1  | 4.19   | 2.52  | 2.38 | 22.2   | 1.84   | 24.2   | 4.03   | 105  | 12.2  | 11.5  | 1.72  | 172  | 27.7 | 40.6    | 8.53   | 1.18   | 0.53   | 659000 | 12100 | 5780   | 578   | 24500  | 2340  |      |    |
| LOG13 cv-dg                                                                   | 4 | 74    | 8.8    | 11.1  | 1.93 | 15.9   | 0.825  | 2.49   | 0.846  | 105  | 4.97  | 50.5  | 2.83  | 154  | 12.7 | 34.7    | 1.6    | 3.38   | 0.304  | 602000 | 14600 | 1130   | 43.9  | 169000 | 7660  |      |    |
| 16°43'S hydrothermal vent field, East Pacific Rise                            |   |       |        |       |      |        |        |        |        |      |       |       |       |      |      |         |        |        |        |        |       |        |       |        |       |      |    |
| SEPR                                                                          | 1 | 818   | 42.4   | 38.2  | 4.25 | bdl    | bdl    | 477    | 25.6   | 49.9 | 3.72  | 6.67  | 0.558 | bdl  | bdl  | 248     | 25.5   | 190    | 15.3   | 564000 | 15700 | 43300  | 2680  | 81700  | 7320  |      |    |
| Solwara-8, Pacmanus hydrothermal vent field, Pacmanus Basin, Papua New Guinea |   |       |        |       |      |        |        |        |        |      |       |       |       |      |      |         |        |        |        |        |       |        |       |        |       |      |    |
| PM2F2 cc-cv                                                                   | 8 | 664   | 27.5   | 621   | 74.1 | bdl    | bdl    | 18.6   | 5.29   | bdl  | bdl   | 415   | 16.7  | bdl  | bdl  | 219     | 26.7   | 75.1   | 3.58   | 721000 | 11900 | 6640   | 519   | 29900  | 1600  |      |    |
| PYRITE (142)                                                                  |   |       |        |       |      |        |        |        |        |      |       |       |       |      |      |         |        |        |        |        |       |        |       |        |       |      |    |
| TAG-1 (Central), TAG hydrothermal vent field, Mid-Atlantic Ridge              |   |       |        |       |      |        |        |        |        |      |       |       |       |      |      |         |        |        |        |        |       |        |       |        |       |      |    |
| TAGM massive                                                                  | 3 | 0.272 | 0.0771 | 75.4  | 7.47 | bdl    | bdl    | bdl    | bdl    | 50.2 | 6.64  | 5.63  | 0.553 | bdl  | bdl  | 7.82    | 1.06   | 1.38   | 0.168  | 54.4   | 5.28  | 5.54   | 1.55  | 463000 | 18500 |      |    |
| TAG6F massive                                                                 | 7 | 0.251 | 0.089  | 30.6  | 7.89 | 0.0254 | 0.0173 | 0.202  | 0.225  | 182  | 55    | 0.707 | 0.291 | bdl  | bdl  | 10.6    | 4.17   | 0.321  | 0.0912 | 180    | 43.3  | 2.9    | 1.85  | 464000 | 92000 |      |    |
| TAG6F colloform interior                                                      | 4 | 0.316 | 0.144  | 45.5  | 11.7 | 0.151  | 0.0434 | 0.0829 | 0.0838 | 636  | 64.8  | 0.933 | 0.478 | bdl  | bdl  | 1.74    | 0.22   | 0.545  | 0.246  | 1930   | 358   | 169    | 146   | 464000 | 35200 |      |    |
| TAG6F                                                                         | 2 | 0.194 | 0.0687 | 67.2  | 11.3 | 0.0485 | 0.0242 | bdl    | bdl    | 813  | 87    | 2.09  | 0.494 | bdl  | bdl  | 1.15    | 0.154  | 0.748  | 0.15   | 555    | 150   | 39.2   | 12.3  | 462000 | 35300 |      |    |

|                                                                         |    | Ag    |       | As   |       | Bi     |        | Cd     |       | Co     |        | Mn    |       | Ni    |      | Pb     |        | Sb     |        | Cu   |       | Zn    |        | Fe     |       | Hg   |    |
|-------------------------------------------------------------------------|----|-------|-------|------|-------|--------|--------|--------|-------|--------|--------|-------|-------|-------|------|--------|--------|--------|--------|------|-------|-------|--------|--------|-------|------|----|
| Sample                                                                  | N  | mean  | SD    | mean | SD    | mean   | SD     | mean   | SD    | mean   | SD     | mean  | SD    | mean  | SD   | mean   | SD     | mean   | SD     | mean | SD    | mean  | SD     | mean   | SD    | mean | SD |
| colloform exterior                                                      |    |       |       |      |       |        |        |        |       |        |        |       |       |       |      |        |        |        |        |      |       |       |        |        |       |      |    |
| TAG27 porous                                                            | 8  | 0.355 | 0.114 | 47.4 | 8.77  | 0.185  | 0.0908 | bdl    | bdl   | 404    | 101    | 1.58  | 0.635 | bdl   | bdl  | 20.5   | 6.76   | 0.722  | 0.197  | 484  | 150   | 7.53  | 2.98   | 461000 | 62200 |      |    |
| TAG-4 (West), TAG hydrothermal vent field, Mid-Atlantic Ridge           |    |       |       |      |       |        |        |        |       |        |        |       |       |       |      |        |        |        |        |      |       |       |        |        |       |      |    |
| TAGH massive                                                            | 6  | 0.721 | 0.108 | 32.1 | 2.77  | bdl    | bdl    | 0.178  | 0.131 | 8.61   | 1.46   | 7.6   | 0.819 | 1.96  | 1.12 | 55     | 4.48   | 0.831  | 0.0891 | 27.3 | 3.98  | 12.9  | 2.3    | 464000 | 20000 |      |    |
| TAGI colloform                                                          | 2  | bdl   | bdl   | 60.8 | 7.26  | 0.0256 | 0.0144 | 0.112  | 0.139 | 0.0549 | 0.0852 | 11.6  | 0.478 | bdl   | bdl  | 243    | 29.1   | 2.26   | 0.169  | 1.67 | 1.07  | 24.1  | 1.94   | 459000 | 20000 |      |    |
| TAGI colloform                                                          | 3  | bdl   | bdl   | 178  | 8.09  | 0.022  | 0.0141 | bdl    | bdl   | 0.177  | 0.106  | 1.87  | 0.176 | 1.77  | 1.14 | 225    | 12.8   | 10.7   | 0.723  | 1.97 | 0.676 | 4.69  | 1      | 444000 | 22700 |      |    |
| TAG47 massive                                                           | 9  | 2.33  | 0.428 | 47.9 | 8.16  | bdl    | bdl    | 2.1    | 0.739 | 10.5   | 2.41   | 17.9  | 1.23  | bdl   | bdl  | 92.4   | 14.2   | 2.07   | 0.266  | 75.3 | 9.58  | 836   | 186    | 462000 | 30900 |      |    |
| TAG46 massive                                                           | 8  | 7.32  | 2.41  | 325  | 106   | bdl    | bdl    | 0.119  | 0.172 | 13.2   | 5.91   | 72    | 19    | 2.04  | 1.54 | 111    | 21.5   | 3.38   | 0.591  | 169  | 27.2  | 45.3  | 8.04   | 463000 | 54200 |      |    |
| TAG48 massive                                                           | 10 | 6.35  | 2.1   | 56.1 | 6.03  | bdl    | bdl    | 0.81   | 0.589 | 19.4   | 4.6    | 18.8  | 11.8  | 5.75  | 4.39 | 101    | 13.6   | 3.23   | 0.68   | 61.1 | 11.2  | 572   | 326    | 458000 | 40000 |      |    |
| TAG48 colloform                                                         | 1  | 0.505 | 0.157 | 8.1  | 1.95  | bdl    | bdl    | bdl    | bdl   | 3.41   | 0.252  | 55.7  | 1.84  | 17.5  | 13.4 | 59.6   | 3.59   | 0.822  | 0.436  | 10.2 | 2.55  | 95.6  | 7.47   | 458000 | 54400 |      |    |
| TAG48 interior                                                          |    |       |       |      |       |        |        |        |       |        |        |       |       |       |      |        |        |        |        |      |       |       |        |        |       |      |    |
| TAG48 colloform exterior                                                | 2  | 4.96  | 0.731 | 8.62 | 2.09  | 0.0352 | 0.0212 | 0.524  | 0.407 | 3.02   | 0.33   | 41.4  | 1.91  | bdl   | bdl  | 61.5   | 3.45   | 1.13   | 0.256  | 55.8 | 7.37  | 626   | 125    | 444000 | 46600 |      |    |
| TAGJ massive                                                            | 6  | 15.7  | 1.36  | 104  | 7.27  | 0.133  | 0.0306 | 0.167  | 0.153 | 73.7   | 7.6    | 5.87  | 0.598 | 7.45  | 2.14 | 175    | 16.1   | 8.26   | 0.9    | 579  | 44.3  | 43    | 6.72   | 462000 | 27100 |      |    |
| TAG-5 (North), TAG hydrothermal vent field, Mid-Atlantic Ridge          |    |       |       |      |       |        |        |        |       |        |        |       |       |       |      |        |        |        |        |      |       |       |        |        |       |      |    |
| TAGK massive                                                            | 3  | 0.252 | 14.9  | 33.9 | 7.48  | 0.131  | 14.5   | 0.109  | 32    | 237    | 7.68   | 0.707 | 22.3  | bdl   | bdl  | 5.6    | 8.37   | 0.387  | 23     | 261  | 7.94  | 7.3   | 32.1   | 464000 | 5440  |      |    |
| TAGL porous                                                             | 2  | bdl   | bdl   | 1.33 | 0.421 | bdl    | bdl    | 0.0807 | 0.115 | 3.41   | 0.764  | 0.236 | 0.108 | 1     | 1.05 | 0.0123 | 0.0139 | bdl    | bdl    | 11.7 | 2.72  | 0.728 | 0.512  | 465000 | 18100 |      |    |
| Inactive mound, Turtle Pits hydrothermal vent field, Mid-Atlantic Ridge |    |       |       |      |       |        |        |        |       |        |        |       |       |       |      |        |        |        |        |      |       |       |        |        |       |      |    |
| TP2L massive                                                            | 8  | 0.106 | 0.1   | 78.2 | 8     | 0.0116 | 0.0181 | 0.129  | 0.245 | 674    | 125    | 0.92  | 0.513 | 0.302 | 0.87 | 1.66   | 0.907  | 0.0163 | 0.0258 | 46.2 | 14.6  | 1.71  | 1.91   | 460000 | 37100 |      |    |
| TP2LTS massive                                                          | 6  | 3.23  | 0.476 | 1360 | 139   | 0.01   | 0.0205 | 0.66   | 0.662 | 260    | 61.5   | 14.6  | 2.14  | 2.66  | 5.1  | 69.5   | 12.8   | 6.03   | 0.652  | 433  | 66.7  | 503   | 143    | 460000 | 34800 |      |    |
| TP2LTS colloform                                                        | 5  | 12.2  | 0.986 | 29.7 | 3.58  | 0.0116 | 0.022  | 0.512  | 0.611 | 331    | 48.3   | 522   | 26.1  | 3.25  | 4.58 | 92.5   | 11.4   | 1.13   | 0.302  | 2770 | 140   | 140   | 11.2   | 444000 | 28600 |      |    |
| TP2L colloform                                                          | 2  | 3.93  | 0.332 | 6.36 | 0.856 | bdl    | bdl    | 0.557  | 0.252 | 23.5   | 2.08   | 65    | 5.26  | 2.25  | 2.22 | 735    | 37.7   | 0.629  | 0.105  | 3990 | 228   | 459   | 444000 | 25300  | 3.93  |      |    |
| TP2L colloform                                                          | 4  | 12    | 0.734 | 20.5 | 1.66  | bdl    | bdl    | 0.366  | 0.263 | 174    | 9.86   | 167   | 9.17  | 5.33  | 2.8  | 638    | 37.1   | 1.42   | 0.165  | 4940 | 303   | 427   | 444000 | 22900  | 12    |      |    |

|                                                                                   |    | Ag     |        | As    |      | Bi     |        | Cd    |        | Co     |        | Mn    |       | Ni    |      | Pb    |       | Sb     |        | Cu    |       | Zn    |       | Fe     |       | Hg   |     |
|-----------------------------------------------------------------------------------|----|--------|--------|-------|------|--------|--------|-------|--------|--------|--------|-------|-------|-------|------|-------|-------|--------|--------|-------|-------|-------|-------|--------|-------|------|-----|
| Sample                                                                            | N  | mean   | SD     | mean  | SD   | mean   | SD     | mean  | SD     | mean   | SD     | mean  | SD    | mean  | SD   | mean  | SD    | mean   | SD     | mean  | SD    | mean  | SD    | mean   | SD    | mean | SD  |
| Southern Tower, Turtle Pits hydrothermal vent field, Mid-Atlantic Ridge           |    |        |        |       |      |        |        |       |        |        |        |       |       |       |      |       |       |        |        |       |       |       |       |        |       |      |     |
| TP4B porous                                                                       | 17 | 1.3    | 0.231  | 280   | 33.6 | 0.0182 | 0.0145 | 0.327 | 0.346  | 257    | 83.3   | 2.1   | 0.76  | 0.638 | 1.03 | 158   | 14.2  | 0.94   | 0.23   | 347   | 305   | 18.3  | 11    | 463000 | 26200 |      |     |
| 16°43'S hydrothermal vent field, East Pacific Rise                                |    |        |        |       |      |        |        |       |        |        |        |       |       |       |      |       |       |        |        |       |       |       |       |        |       |      |     |
| SEPR massive                                                                      | 4  | 8.99   | 0.606  | 59    | 4.05 | 0.0162 | 0.0163 | 0.42  | 0.34   | 48.5   | 2.32   | 82.8  | 3.56  | 2.01  | 1.97 | 259   | 11.1  | 2.76   | 0.329  | 10.4  | 1.69  | 427   | 26.4  | 461000 | 27600 |      |     |
| Ashes hydrothermal vent field, Juan de Fuca Ridge*                                |    |        |        |       |      |        |        |       |        |        |        |       |       |       |      |       |       |        |        |       |       |       |       |        |       |      |     |
| AS1 massive                                                                       | 6  | bd1    | bd1    | 177   | 18.9 | 0.0159 | 0.0234 | 0.394 | 0.373  | 245    | 29.6   | 0.756 | 0.359 | 2.72  | 3.81 | 3.27  | 1.01  | 0.0933 | 0.0741 | 5.93  | 3     | 38.8  | 22.1  | 461000 | 34400 |      |     |
| AS1 colloform                                                                     | 5  | 8.59   | 0.655  | 273   | 13   | bd1    | bd1    | 0.594 | 0.358  | 8.39   | 0.544  | 141   | 5.57  | 9.87  | 3.35 | 154   | 6     | 4.82   | 0.387  | 3970  | 159   | 202   | 11.1  | 456000 | 22200 |      |     |
| Roman Ruins, Pacmanus hydrothermal vent field, Pacmanus Basin, Papua New Guinea   |    |        |        |       |      |        |        |       |        |        |        |       |       |       |      |       |       |        |        |       |       |       |       |        |       |      |     |
| PM2D2 massive                                                                     | 3  | 0.601  | 0.104  | 2700  | 83.5 | bd1    | bd1    | 0.212 | 0.199  | 0.0606 | 0.0593 | 7.45  | 0.568 | 0.656 | 1.07 | 266   | 8.06  | 103    | 5.36   | 1.76  | 0.421 | 8.55  | 1.4   | 463000 | 22200 |      |     |
| PM2D massive                                                                      | 5  | 0.0426 | 0.0493 | 5080  | 153  | bd1    | bd1    | 0.124 | 0.105  | 0.0567 | 0.0655 | 12    | 0.435 | bd1   | bd1  | 88.8  | 2.8   | 29.2   | 0.934  | 0.375 | 0.341 | 7.27  | 1.35  | 463000 | 17200 |      |     |
| Satanic Mills, Pacmanus hydrothermal vent field, Pacmanus Basin, Papua New Guinea |    |        |        |       |      |        |        |       |        |        |        |       |       |       |      |       |       |        |        |       |       |       |       |        |       |      |     |
| PM6B2 colloform                                                                   | 2  | 440    | 14.8   | 12200 | 361  | bd1    | bd1    | 12.9  | 1.9    | 0.0412 | 0.0685 | 258   | 6.99  | bd1   | bd1  | 6170  | 268   | 55.1   | 3.22   | 4430  | 224   | 24200 | 2070  | 428000 | 23400 |      |     |
| PM6B colloform                                                                    | 2  | 288    | 10.2   | 13300 | 391  | 0.192  | 0.0468 | 12.2  | 2.42   | 1.67   | 0.328  | 1040  | 45.2  | 46.2  | 3.82 | 12700 | 860   | 877    | 33     | 5000  | 1900  | 54300 | 24600 | 428000 | 17100 |      |     |
| Palinuro Volcanic Complex, Aeolian Island Arc, Italy                              |    |        |        |       |      |        |        |       |        |        |        |       |       |       |      |       |       |        |        |       |       |       |       |        |       |      |     |
| PVC851                                                                            | 8  | bd1    | bd1    | 8240  | 243  | bd1    | bd1    | bd1   | bd1    | bd1    | bd1    | 3520  | 111   | bd1   | bd1  | 302   | 33    | 25.7   | 2.27   | 20.1  | 1.68  | 292   | 28.1  | 470000 | 20000 | bd1  | bd1 |
| PVC932                                                                            | 8  | bd1    | bd1    | 4680  | 157  | bd1    | bd1    | bd1   | bd1    | bd1    | bd1    | 5320  | 161   | bd1   | bd1  | 0.713 | 0.268 | 1.71   | 0.18   | bd1   | bd1   | 33.4  | 2.37  | 442000 | 21100 | bd1  | bd1 |
| MARCASITE (78)                                                                    |    |        |        |       |      |        |        |       |        |        |        |       |       |       |      |       |       |        |        |       |       |       |       |        |       |      |     |
| TAG-1 (Central), TAG hydrothermal vent field, Mid-Atlantic Ridge                  |    |        |        |       |      |        |        |       |        |        |        |       |       |       |      |       |       |        |        |       |       |       |       |        |       |      |     |
| TAGM massive                                                                      | 3  | 0.338  | 0.103  | 81.6  | 8.46 | bd1    | bd1    | 0.274 | 0.275  | 43.8   | 5.78   | 64.2  | 9.85  | bd1   | bd1  | 19    | 2.59  | 0.558  | 0.14   | 57.2  | 6.01  | 6.3   | 1.26  | 463000 | 25500 |      |     |
| TAG-4 (West), TAG hydrothermal vent field, Mid-Atlantic Ridge                     |    |        |        |       |      |        |        |       |        |        |        |       |       |       |      |       |       |        |        |       |       |       |       |        |       |      |     |
| TAGH massive                                                                      | 4  | 3.02   | 0.26   | 31.6  | 2.78 | bd1    | bd1    | 0.414 | 0.218  | 1.99   | 0.327  | 6.46  | 0.565 | 1.27  | 1.43 | 94.1  | 12.3  | 0.52   | 0.105  | 36.5  | 3.47  | 31.1  | 3.53  | 464000 | 20200 |      |     |
| TAGI colloform                                                                    | 3  | 0.134  | 0.0632 | 13.8  | 1.58 | bd1    | bd1    | 0.146 | 0.0973 | 0.368  | 0.142  | 4.71  | 0.407 | 5.15  | 2.18 | 802   | 50.1  | 3.12   | 0.242  | 1.27  | 0.966 | 9.21  | 1.72  | 459000 | 19100 |      |     |
| TAG47 massive                                                                     | 8  | 0.399  | 0.131  | 8.38  | 1.54 | bd1    | bd1    | 0.642 | 0.371  | 1.56   | 0.626  | 5.87  | 0.594 | 1.98  | 2.49 | 9.24  | 1.15  | 0.735  | 0.142  | 18.1  | 2.95  | 214   | 47.4  | 461000 | 20700 |      |     |
| TAG46 massive                                                                     | 8  | 5.76   | 0.826  | 73.7  | 13.3 | bd1    | bd1    | 0.623 | 0.422  | 10.3   | 2.29   | 4.73  | 0.904 | 1.39  | 2.25 | 54.2  | 15.5  | 1.23   | 0.221  | 63.6  | 11.5  | 20    | 6.56  | 461000 | 53100 |      |     |
| TAG48 massive                                                                     | 8  | 1.77   | 0.368  | 7.96  | 2.33 | bd1    | bd1    | bd1   | bd1    | 0.719  | 0.231  | 13.7  | 2.07  | 2.67  | 2.82 | 12.3  | 1.7   | 1.03   | 0.207  | 39.5  | 7.32  | 152   | 27.1  | 459000 | 38200 |      |     |
| TAG48 colloform                                                                   | 3  | 3.28   | 3.76   | 9.32  | 1.95 | bd1    | bd1    | 0.432 | 0.406  | 8.71   | 0.602  | 42.6  | 4.95  | 4.1   | 3.62 | 167   | 15.5  | 1.53   | 0.276  | 62.2  | 10.3  | 1010  | 245   | 455000 | 31400 |      |     |
| TAGJ massive                                                                      | 3  | 8.78   | 0.619  | 30.1  | 2.81 | bd1    | bd1    | 0.164 | 0.137  | 0.564  | 0.167  | 5.93  | 0.312 | 2.85  | 2.22 | 53.2  | 5.35  | 2.83   | 0.247  | 62.5  | 5.83  | 17.7  | 1.87  | 463000 | 17300 |      |     |
| Inactive mound, Turtle Pits hydrothermal vent field, Mid-Atlantic Ridge           |    |        |        |       |      |        |        |       |        |        |        |       |       |       |      |       |       |        |        |       |       |       |       |        |       |      |     |
| TP2LTS colloform                                                                  | 8  | 1.03   | 0.281  | 4.12  | 2.22 | bd1    | bd1    | bd1   | bd1    | 43.9   | 6.9    | 41.3  | 6.06  | bd1   | bd1  | 184   | 16.9  | 0.68   | 0.235  | 1070  | 110   | 64.2  | 9.43  | 460000 | 28200 |      |     |

| Sample                                                                            | N  | Ag    |        | As     |       | Bi    |        | Cd    |       | Co    |       | Mn     |        | Ni    |       | Pb     |       | Sb     |       | Cu     |       | Zn     |       | Fe     |       | Hg   |      |
|-----------------------------------------------------------------------------------|----|-------|--------|--------|-------|-------|--------|-------|-------|-------|-------|--------|--------|-------|-------|--------|-------|--------|-------|--------|-------|--------|-------|--------|-------|------|------|
|                                                                                   |    | mean  | SD     | mean   | SD    | mean  | SD     | mean  | SD    | mean  | SD    | mean   | SD     | mean  | SD    | mean   | SD    | mean   | SD    | mean   | SD    | mean   | SD    | mean   | SD    | mean | SD   |
| Southern Tower, Turtle Pits hydrothermal vent field, Mid-Atlantic Ridge           |    |       |        |        |       |       |        |       |       |       |       |        |        |       |       |        |       |        |       |        |       |        |       |        |       |      |      |
| TP4B porous                                                                       | 7  | 4.83  | 0.49   | 478    | 39.3  | bdl   | bdl    | bdl   | bdl   | 146   | 15.3  | 3.54   | 0.64   | 0.458 | 0.816 | 328    | 21.9  | 1.1    | 0.262 | 410    | 51.2  | 47.8   | 12.1  | 461000 | 30300 |      |      |
| TP4BTS colloform                                                                  | 8  | 3.39  | 0.602  | 193    | 44.3  | bdl   | bdl    | 0.433 | 0.5   | 282   | 37.9  | 1.95   | 0.644  | bdl   | bdl   | 64.7   | 9.1   | 0.908  | 0.352 | 2330   | 295   | 39.3   | 11.3  | 463000 | 19700 |      |      |
| Ashes hydrothermal vent field, Juan de Fuca Ridge*                                |    |       |        |        |       |       |        |       |       |       |       |        |        |       |       |        |       |        |       |        |       |        |       |        |       |      |      |
| AS1 massive                                                                       | 6  | 4.25  | 0.822  | 648    | 42.3  | bdl   | bdl    | 0.184 | 0.159 | 64.4  | 8.1   | 1100   | 54.9   | 13.4  | 11.6  | 51.2   | 3.65  | 1.13   | 0.444 | 1240   | 111   | 335    | 37.8  | 464000 | 30200 |      |      |
| Roman Ruins, Pacmanus hydrothermal vent field, Pacmanus Basin, Papua New Guinea   |    |       |        |        |       |       |        |       |       |       |       |        |        |       |       |        |       |        |       |        |       |        |       |        |       |      |      |
| PM2D2 massive                                                                     | 1  | 0.283 | 0.0659 | 594    | 19.1  | bdl   | bdl    | 0.253 | 0.202 | bdl   | bdl   | 9.64   | 0.365  | bdl   | bdl   | 859    | 23.4  | 583    | 14.8  | 1.36   | 0.565 | 11.7   | 1.18  | 462000 | 20300 |      |      |
| Satanic Mills, Pacmanus hydrothermal vent field, Pacmanus Basin, Papua New Guinea |    |       |        |        |       |       |        |       |       |       |       |        |        |       |       |        |       |        |       |        |       |        |       |        |       |      |      |
| PM5E2 massive                                                                     | 8  | 0.495 | 0.201  | 247    | 18.5  | bdl   | bdl    | bdl   | bdl   | bdl   | bdl   | 312    | 13.4   | 2.11  | 7.23  | 9.32   | 1.72  | 0.138  | 0.158 | 6.73   | 2.67  | 20.8   | 8.29  | 464000 | 29400 |      |      |
| GALENA (23)                                                                       |    |       |        |        |       |       |        |       |       |       |       |        |        |       |       |        |       |        |       |        |       |        |       |        |       |      |      |
| Roman Ruins, Pacmanus hydrothermal vent field, Pacmanus Basin, Papua New Guinea   |    |       |        |        |       |       |        |       |       |       |       |        |        |       |       |        |       |        |       |        |       |        |       |        |       |      |      |
| PM2D2                                                                             | 1  | 600   | 31.8   | bdl    | bdl   | bdl   | bdl    | 5.71  | 0.825 | 0.171 | 0.134 | 0.316  | 0.22   | 4.81  | 3.46  | 843000 | 13900 | 3240   | 82.5  | 3.77   | 0.898 | 3.4    | 3.51  | bdl    | bdl   |      |      |
| PM2D                                                                              | 3  | 8580  | 247    | 191    | 54.5  | 15.1  | 0.367  | 0.182 | 0.178 | bdl   | bdl   | 0.0489 | 0.0611 | 0.767 | 0.933 | 843000 | 7950  | 26500  | 610   | 49.9   | 1.32  | 11.9   | 1.21  | 8.88   | 8.85  |      |      |
| PM2DTS                                                                            | 8  | 4580  | 151    | 137    | 11.4  | bdl   | bdl    | 1.25  | 0.426 | bdl   | bdl   | 0.332  | 0.143  | bdl   | bdl   | 843000 | 21600 | 32300  | 784   | 156    | 5.31  | 759    | 334   | 33.6   | 18.8  |      |      |
| Satanic Mills, Pacmanus hydrothermal vent field, Pacmanus Basin, Papua New Guinea |    |       |        |        |       |       |        |       |       |       |       |        |        |       |       |        |       |        |       |        |       |        |       |        |       |      |      |
| PM6BTS                                                                            | 5  | 471   | 28.7   | 5570   | 253   | 9.08  | 0.525  | 77.2  | 11.8  | 0.27  | 0.239 | 1.84   | 0.558  | bdl   | bdl   | 859000 | 10800 | 3150   | 194   | 112    | 19.2  | 6910   | 1020  | 211    | 125   |      |      |
| Palinuro Volcanic Complex, Aeolian Island Arc, Italy                              |    |       |        |        |       |       |        |       |       |       |       |        |        |       |       |        |       |        |       |        |       |        |       |        |       |      |      |
| PVC851                                                                            | 2  | 2.31  | 0.197  | 1560   | 25.8  | 8.03  | 0.13   | 52.1  | 2.93  | bdl   | bdl   | 0.502  | 0.192  | bdl   | bdl   | 847000 | 7250  | 8550   | 164   | 63.4   | 1.77  | 2490   | 484   | bdl    | bdl   | 211  | 13.1 |
| PVC932                                                                            | 16 | 39.8  | 1.43   | 4970   | 219   | 7.8   | 0.196  | 41.8  | 1.58  | bdl   | bdl   | 0.416  | 0.0361 | bdl   | bdl   | 864000 | 6990  | 60.3   | 10.5  | 49.7   | 1.72  | 78.1   | 37.4  | bdl    | bdl   | 48.8 | 3.52 |
| TENNANTITE-TETRAHEDRITE (23)                                                      |    |       |        |        |       |       |        |       |       |       |       |        |        |       |       |        |       |        |       |        |       |        |       |        |       |      |      |
| Satanic Mills, Pacmanus hydrothermal vent field, Pacmanus Basin, Papua New Guinea |    |       |        |        |       |       |        |       |       |       |       |        |        |       |       |        |       |        |       |        |       |        |       |        |       |      |      |
| PM5E2                                                                             | 5  | 932   | 28.8   | 261000 | 9370  | 2.79  | 0.233  | 313   | 14.5  | 0.513 | 0.145 | 6.19   | 0.562  | 7.28  | 10.8  | 1240   | 50    | 18300  | 925   | 407000 | 6420  | 37000  | 1250  | 43600  | 1810  |      |      |
| PM5E                                                                              | 6  | 695   | 17.8   | 236000 | 9540  | 8.06  | 0.572  | 286   | 15    | 0.751 | 0.219 | 5.26   | 0.36   | 1.08  | 1.61  | 2980   | 184   | 18200  | 1060  | 407000 | 5610  | 32500  | 1180  | 43400  | 3160  |      |      |
| PM6B2                                                                             | 2  | 3670  | 209    | 211000 | 7800  | 23.4  | 1.08   | 1810  | 232   | 0.189 | 0.145 | 6.67   | 1.35   | 5.93  | 4.11  | 12000  | 1060  | 32700  | 1240  | 319000 | 6050  | 141000 | 14500 | 15600  | 1010  |      |      |
| Solwara-8, Pacmanus hydrothermal vent field, Pacmanus Basin, Papua New Guinea     |    |       |        |        |       |       |        |       |       |       |       |        |        |       |       |        |       |        |       |        |       |        |       |        |       |      |      |
| PM2F2                                                                             | 8  | 85.9  | 2.84   | 236000 | 10900 | 0.069 | 0.0386 | 433   | 21    | 0.16  | 0.21  | 35.4   | 5.95   | 1.28  | 2.71  | 1970   | 96.7  | 2070   | 193   | 402000 | 7320  | 49100  | 1830  | 36200  | 1550  |      |      |
| PM2F                                                                              | 2  | 447   | 10.4   | 246000 | 9140  | bdl   | bdl    | 455   | 17.7  | bdl   | bdl   | 3.46   | 0.321  | bdl   | bdl   | 655    | 24.2  | 5440   | 203   | 402000 | 7390  | 59400  | 1690  | 35900  | 1260  |      |      |
| Palinuro Volcanic Complex, Aeolian Island Arc, Italy                              |    |       |        |        |       |       |        |       |       |       |       |        |        |       |       |        |       |        |       |        |       |        |       |        |       |      |      |
| PVC9832                                                                           | 8  | 4740  | 121    | 141000 | 3970  | 4.21  | 0.859  | 981   | 40.3  | bdl   | bdl   | 6.71   | 0.972  | bdl   | bdl   | 1290   | 222   | 193000 | 5150  | 394000 | 2970  | 63800  | 1630  | 29400  | 1470  | 3210 | 177  |
| PYRRHOTITE (10)                                                                   |    |       |        |        |       |       |        |       |       |       |       |        |        |       |       |        |       |        |       |        |       |        |       |        |       |      |      |
| Southern Tower, Turtle Pits hydrothermal vent field, Mid-Atlantic Ridge           |    |       |        |        |       |       |        |       |       |       |       |        |        |       |       |        |       |        |       |        |       |        |       |        |       |      |      |
| TP4BTS                                                                            | 3  | 7.12  | 2.02   | n/a    | n/a   | 0.817 | 0.395  | 23.1  | 9     | 2370  | 73.8  | 8.33   | 2.56   | 47.7  | 31.7  | 940    | 149   | 13.8   | 3.14  | n/a    | n/a   | n/a    | n/a   | 598000 | 24200 |      |      |

**Table S7** Trace element distribution in various sulfides from a range of samples (where no LA-ICP-MS data available) from EMPA in ppm and 2 sigma standard deviation. N;number of analysis bdl; below the minimum detection limit

| Sample                                                                            | N  | As<br>mean | SD     | Sb<br>mean | SD    | Cu<br>mean | SD       | Zn<br>mean | SD     | Fe<br>Mean | SD       | Mn<br>Mean | SD    | S<br>Mean | SD       | Hg<br>Mean | SD  | Co<br>Mean | SD  | Pb<br>Mean | SD   |
|-----------------------------------------------------------------------------------|----|------------|--------|------------|-------|------------|----------|------------|--------|------------|----------|------------|-------|-----------|----------|------------|-----|------------|-----|------------|------|
| PYRRHOTITE (40)                                                                   |    |            |        |            |       |            |          |            |        |            |          |            |       |           |          |            |     |            |     |            |      |
| Southern Tower, Turtle Pits hydrothermal vent field, Mid-Atlantic Ridge           |    |            |        |            |       |            |          |            |        |            |          |            |       |           |          |            |     |            |     |            |      |
| TP4BTS                                                                            | 26 | Bdl        | bdl    |            |       | 3800       | 100      | 600        | 100    |            |          |            |       |           |          |            |     | 3800       | 100 |            |      |
| TP4B                                                                              | 14 | Bdl        | bdl    |            |       | 3200       | 300      | 1100       | 100    |            |          |            |       |           |          |            |     | n/a        | n/a |            |      |
| COLLOFORM PYRITE (25)                                                             |    |            |        |            |       |            |          |            |        |            |          |            |       |           |          |            |     |            |     |            |      |
| Satanic Mills, Pacmanus hydrothermal vent field, Pacmanus Basin, Papua New Guinea |    |            |        |            |       |            |          |            |        |            |          |            |       |           |          |            |     |            |     |            |      |
| PM6B                                                                              | 10 | 9417.92    | 321.38 | 88.33      | 72.51 | 4799.96    | 259.84   | 12166.51   | 204.71 | 429342.57  | 19396.39 | 640.07     | 75.73 | 516056.07 | 16401.01 |            |     |            |     |            |      |
| PM5E                                                                              | 9  | 8625.29    | 323.31 | Bdl        | bdl   | 6865.43    | 41840.41 | 18230.92   | 345.63 | 416249.80  | 18850.21 | 861.31     | 81.78 | 516164.68 | 16415.76 |            |     |            |     |            |      |
| Palinuro Volcanic Complex, Aeolian Island Arc, Italy                              |    |            |        |            |       |            |          |            |        |            |          |            |       |           |          |            |     |            |     |            |      |
| PVC932<br>colloform                                                               | 6  | 4400       | 200    | Bdl        | Bdl   | Bdl        | Bdl      |            |        |            |          |            |       |           |          | Bdl        | Bdl |            |     | 4600       | 400  |
| COLLOFORM CHALCOPYRITE (19)                                                       |    |            |        |            |       |            |          |            |        |            |          |            |       |           |          |            |     |            |     |            |      |
| Satanic Mills, Pacmanus hydrothermal vent field, Pacmanus Basin, Papua New Guinea |    |            |        |            |       |            |          |            |        |            |          |            |       |           |          |            |     |            |     |            |      |
| PM6B                                                                              | 7  | 823.34     | 201.95 | 860.06     | 94.79 | 345870.44  | 11640.6  | 1984.99    | 105.86 | 304808.39  | 12185.79 | Bdl        | Bdl   | 346378.39 | 9809.51  |            |     |            |     |            |      |
| PM5E                                                                              | 7  | 628.49     | 130.93 | 321.46     | 74.84 | 347971.49  | 13906.11 | 6018.01    | 138.5  | 298464.53  | 13497.67 | Bdl        | bdl   | 346580.8  | 11051.08 |            |     |            |     |            |      |
| PM5E                                                                              | 2  | 541.45     | 111.51 | 393.15     | 74.36 | 351138.8   | 14031.45 | 1919.65    | 79.89  | 299449.8   | 13540.36 | Bdl        | Bdl   | 345138.35 | 11005.83 |            |     |            |     |            |      |
| PM5E                                                                              | 3  | 2607.2     | 152.81 | 1716.27    | 89.33 | 320451.7   | 12890.05 | 17721.7    | 321.77 | 278106.83  | 12597.37 | Bdl        | bdl   | 329060    | 10498.83 |            |     |            |     |            |      |
| GALENA (80)                                                                       |    |            |        |            |       |            |          |            |        |            |          |            |       |           |          |            |     |            |     |            |      |
| Satanic Mills, Pacmanus hydrothermal vent field, Pacmanus Basin, Papua New Guinea |    |            |        |            |       |            |          |            |        |            |          |            |       |           |          |            |     |            |     |            |      |
| PM2D                                                                              | 19 | Bdl        | Bdl    | 16100      | 300   | 100        | 100      |            |        |            |          |            |       |           |          | 100        | 100 |            |     | 836500     | 7900 |
| PM5E                                                                              | 2  | 35200      | 900    | Bdl        | Bdl   | 700        | 100      |            |        |            |          |            |       |           |          | 100        | 100 |            |     | 845100     | 7900 |
| PM6BTS                                                                            | 12 | 7500       | 200    | 3000       | 100   | Bdl        | Bdl      |            |        |            |          |            |       |           |          | Bdl        | bdl |            |     | 859500     | 8000 |
| PVC932                                                                            | 19 | 4200       | 100    | 200        | 100   | Bdl        | Bdl      |            |        |            |          |            |       |           |          | 100        | 100 |            |     | 864200     | 0.81 |
| PVC851                                                                            | 28 | 1800       | 100    | 10800      | 200   | bdl        | bdl      |            |        |            |          |            |       |           |          | 300        | 100 |            |     | 846600     | 0.79 |
| SPHALERITE (7)                                                                    |    |            |        |            |       |            |          |            |        |            |          |            |       |           |          |            |     |            |     |            |      |
| Palinuro Volcanic Complex, Aeolian Island Arc, Italy                              |    |            |        |            |       |            |          |            |        |            |          |            |       |           |          |            |     |            |     |            |      |
| PVC851<br>colloform                                                               | 7  | 2600       | 100    | Bdl        | Bdl   | 900        | 100      | 2800       | 100    |            |          |            |       |           |          | 9400       | 200 |            |     | 15700      | 600  |
| TENNANTITE-TETRAHEDRITE (6)                                                       |    |            |        |            |       |            |          |            |        |            |          |            |       |           |          |            |     |            |     |            |      |
| Palinuro Volcanic Complex, Aeolian Island Arc, Italy                              |    |            |        |            |       |            |          |            |        |            |          |            |       |           |          |            |     |            |     |            |      |
| PVC932                                                                            | 6  | 100200     | 2600   | 156700     | 2300  | 393600     | 3300     |            |        |            |          |            |       |           |          | 1700       | 300 |            |     | 3900       | 900  |

**Table S8** Trace element contents (ppm) of common sulfide minerals from SMS deposits derived from electron microprobe analysis (EPMA), laser ablation inductively coupled mass spectrometry (LA-ICPMS) and bulk analysis of mineral concentrates. *Abbreviations used:* MAR, Mid Atlantic Ridge; EPR, East Pacific Rise; JDFR, Juan de Fuca Ridge; PNG, Papua New Guinea.

| No.                                  | Ag       | As         | Cd      | Co           | Cu                  | Pb           | Sb          | Zn          | Other                           | Location (setting)                 | Authors                  |
|--------------------------------------|----------|------------|---------|--------------|---------------------|--------------|-------------|-------------|---------------------------------|------------------------------------|--------------------------|
| Pyrrhotite (Fe <sub>1-x</sub> S)     |          |            |         |              |                     |              |             |             |                                 |                                    |                          |
| 27                                   | 200      |            | 200-300 | 600-4000     | 200                 |              |             | 200-1900    | 100-1100 Ni                     | Rainbow vent field, MAR            | Marques et al. (2006)    |
|                                      | 400 -700 |            | 0-400   |              | 100-600             |              |             | 0-700       |                                 | Southern JDFR                      | Paradis et al. (1988)    |
| 14                                   | <400     | <300 – 750 |         |              | 650                 |              |             | <600 - 800  | <300 Se                         | Endeavour Segment, JDFR            | Tivey et al. (1999)      |
| Marcasite (FeS <sub>2</sub> )        |          |            |         |              |                     |              |             |             |                                 |                                    |                          |
| 2                                    |          | 783-928    | 137-154 | 60-200       |                     |              | 40-74       |             |                                 | Axial Seamount, JDFR               | Hannington et al. (1991) |
|                                      |          |            | 0       | 0            | 100                 |              |             | 800         | 100 Ni                          | Alice Spring Field, Mariana Trough | Iwaida and Ueno (2005)   |
| 3-                                   |          |            |         |              |                     |              |             |             | Avg 4.35 Mn                     | TAG hydrothermal field, MAR        | Grant et al. (2018)      |
| 26                                   | 10.6     | 30.2       | 87.8    | 60.5         | 67.7                | 1.96         | 201.3       | 10.6        | Avg 16.9 Ni<br>Avg 0.24 Bi      |                                    |                          |
| Pyrite/Marcasite (FeS <sub>2</sub> ) |          |            |         |              |                     |              |             |             |                                 |                                    |                          |
| 22                                   | 0.31-412 | 41-2200    | 0-79    | 2.88-666.26  | 76-38000            | 7.4-6400     | 0.48-255.21 | 4-48090     | 0.5-157.7 Ni<br>0.003-668.15 TI | Menez Gwen Field, MAR              | Lein et al. (2010)       |
| 161                                  |          | 600        |         |              |                     |              |             |             | Max 600 Hg, Avg <200            | Hook Ridge, Antarctica             | Petersen et al. (2004)   |
| 85                                   | <400     | 750-1676   |         | <200<br><400 | <200<br><700 – 2570 | <1200        | <100        | <600 - 750  | <400 – 3900 Mn                  | Endeavour Segment, JDFR            | Tivey et al. (1999)      |
| 20                                   |          | bdl-7200   |         |              | bdl-2000            |              |             | 1550-8477   | Avg 6333 Mn                     | Mothra hydrothermal field, JDFR    | Kristall et al. (2006)   |
| Pyrite (FeS <sub>2</sub> )           |          |            |         |              |                     |              |             |             |                                 |                                    |                          |
| 1                                    | 62       | 115        | <10     | 51           |                     |              | 5           |             | 124 Mo                          | TAG hydrothermal field, MAR        | Hannington et al. (1991) |
| 167                                  | <400     | <400       |         | <400 – 1460  | <600 - 2686         | <1200 – 7075 |             | <600 - 8783 | <300 – 430 Se                   | TAG hydrothermal field, MAR        | Tivey et al. (1995)      |
| 70-                                  |          |            |         |              |                     |              |             |             | Avg 13.1 Mn                     | TAG hydrothermal field, MAR        | Grant et al. (2018)      |
| 252                                  | 3.42     | 46         | 1.29    | 447.7        | 132                 | 36.9         | 2.73        | 51          | Avg 22 Ni<br>Avg 0.45 Bi        |                                    |                          |
| 4                                    | 14-95    | 436-1740   | <10-10  | 2-85         |                     |              | 4-19        |             | 47-62 Mo<br><2 to 98 Se         | Snakepit vent field, MAR           | Hannington et al. (1991) |
| 49                                   | 100      |            | 100     | 1200-        | 1000                |              |             | 400-3000    | Avg 300 Ni                      | Rainbow vent field, MAR            | Marques et al. (2006)    |

| No. | Ag         | As       | Cd        | Co         | Cu        | Pb           | Sb         | Zn     | Other                         | Location (setting)                                      | Authors                              |
|-----|------------|----------|-----------|------------|-----------|--------------|------------|--------|-------------------------------|---------------------------------------------------------|--------------------------------------|
| 40  |            | 224      |           | 1800       |           |              | 4.94       |        | Avg 25.2 Se, 0.25 Au, 1.2 Te  | Turtle Pits, MAR                                        | Wohlgemuth-Ueberwasser et al. (2015) |
| 38  |            | 257      |           |            | 500       | bdl          | bdl        | 937.5  |                               | Turtle Pits, MAR                                        |                                      |
| 23  |            | 326      |           |            |           |              | 11.2       |        | Avg 15.5 Se, 4.18 Au, 0.58 Te | Logatchev, MAR                                          |                                      |
| 6   |            | bdl      |           |            | 300       | bdl          | bdl        | bdl    |                               | Logatchev, MAR                                          | Wohlgemuth-Ueberwasser et al. (2015) |
| 3   | 18         | 664.3    | 26.6      | 36         |           |              | 10.3       |        | 20-200 Se                     | Southern Explorer Ridge                                 | Hannington et al. (1991)             |
| 16  | <200       | 600      | <200      | 200        | 3600      | 200          | <200       | 1300   | Avg 400 Ni                    | Kairei vent field, Indian Ridge                         | Wang et al. (2014)                   |
|     |            |          |           |            |           |              |            |        | Avg 200 Se                    |                                                         |                                      |
| 19  | 143        | 224      | 8.71      | 110        | 500       | 444          | 3.91       | 300    | Avg 538 Mn                    | Wocan hydrothermal field, Carlsberg Ridge, Indian Ocean | Wang et al. (2017)                   |
|     |            |          |           |            |           |              |            |        | Avg 36.4 Se                   |                                                         |                                      |
| 26  | 85         | 312      | 613       | 2554       | 217       | 69           | 45         | 1784   | Avg 9 Ni                      | Longqi, Southwest Indian Ridge                          | (Zhang et al., 2018)                 |
|     |            |          |           |            |           |              |            |        | Avg 84 Au                     |                                                         |                                      |
| 22  | 98         | 407      | 134       | 919        | 1020      | 1103         | 23         | 11855  | Avg 16 Ni                     | Duanqiao, Southwest Indian Ridge                        | (Zhang et al., 2018)                 |
|     |            |          |           |            |           |              |            |        | Avg 229 Au                    |                                                         |                                      |
| 6   |            | 800-2600 |           | 1000-12100 | 800-2400  |              |            |        |                               | Green Seamount, EPR                                     | Alt et al. (1987)                    |
| 339 | <200       | 2950     | <200      |            | 2300      | 3350         | 450        | 550    | Max 6900 Hg, Avg <300         | Palinuro Volcanic Complex, Aeolian Arc, Italy           | Petersen et al. (2014)               |
| 3   |            |          | 0-100     | 400-600    | 500-11700 |              |            | 0-3500 | 0 Ni                          | Alice Spring Field, Mariana Trough                      | Iwaida and Ueno (2005)               |
| 3   |            | 0-500    |           |            |           |              |            |        | 0-200 Au                      | North Knoll, Iheya Ridge, Okinawa Trough                | Ueno et al. (2003)                   |
| 58  |            | 2635     |           |            |           |              | 188        |        | Avg 7.39 Se, 7.71 Au, 1.1 Te  | Roman Ruins, Pacmanus Basin, PNG                        |                                      |
| 44  |            | 3636     |           |            | 2200      | 3236         | 144        | 4981   |                               | Roman Ruins, Pacmanus Basin, PNG                        | Wohlgemuth-Ueberwasser et al. (2015) |
| 5   |            | 5390     |           |            |           |              | 29.4       |        | Avg 5.97 Se, 8.16 Au, bdl Te  | Satanic Mills, Pacmanus Basin, PNG                      |                                      |
| 2   |            | bdl      |           |            | 8200      | 4100         | bdl        | 2900   |                               | Satanic Mills, Pacmanus Basin, PNG                      |                                      |
|     |            |          |           |            |           |              |            |        | Sphalerite ((ZnFe)S)          |                                                         |                                      |
| 34  | 0-1700     | 0-10100  | 0-9000    |            | 0-7900    | 0            | 0-1300     |        | 0-900 In, Ni                  | Menez Gwen Field, MAR                                   | Lein et al. (2010)                   |
|     |            |          |           |            |           |              |            |        | 3600-18000 Fe                 |                                                         |                                      |
| 3   | 49-206     | 66-93    | 599-1646  | 55-101     |           |              | 25-56      |        | <0.1-5.7 Au                   | TAG hydrothermal field, MAR                             | Hannington et al. (1991)             |
|     |            |          |           |            |           |              |            |        | <1-30 Mo, <2-23 Se            |                                                         |                                      |
| 88  | <400 – 917 |          | 1400-3076 |            | 1804-9988 | <1000 – 1600 | <400 - 900 |        | 6094-34006 Fe                 | TAG hydrothermal field, MAR                             | Tivey et al. (1995)                  |
|     |            |          |           |            |           |              |            |        | <300 Mn                       |                                                         |                                      |



| No.  | Ag       | As      | Cd         | Co   | Cu       | Pb    | Sb       | Zn | Other                                                     | Location (setting)                                      | Authors                              |
|------|----------|---------|------------|------|----------|-------|----------|----|-----------------------------------------------------------|---------------------------------------------------------|--------------------------------------|
| 4-19 | 58.5     | 63      | 1202       | 19.6 | 1364     | 125   | 41.3     |    | Avg 24191 Fe<br>Avg 17.4 Mn<br>Avg 10.2 Ni<br>Avg 0.04 Bi | TAG hydrothermal field, MAR                             | Grant et al. (2018)                  |
| 2    | 430-1147 | 769-881 | 515-829    | 7-18 |          |       | 138-163  |    | 10.7-18.3 Au<br>25-29 Mo, <2 Se                           | Snakepit vent field, MAR                                | Hannington et al. (1991)             |
| 5    | 1000     |         | 600        | 100  | 2200     |       |          |    | Avg 14000 Fe                                              | Rainbow vent field, MAR                                 | Marques et al. (2006)                |
| 20   |          | 147     |            |      |          |       | 47.9     |    | 0.36 Au, 28.2 Se, 0.62 Te                                 | Turtle Pits, MAR                                        | Wohlgemuth-Ueberwasser et al. (2015) |
| 6    |          | 100     |            |      | 1450     | bdl   | bdl      |    | 142000 Fe                                                 | Turtle Pits, MAR                                        |                                      |
| 10   |          | 214     |            |      |          |       | 223      |    | 3.73 Au, 1.68 Se, 0.73 Te                                 | Logatchev, MAR                                          | Wohlgemuth-Ueberwasser et al. (2015) |
| 8    |          | 300     |            |      | 11400    | bdl   | 300      |    | 114500 Fe                                                 | Logatchev, MAR                                          |                                      |
| 12   | <200     | 400     | 1000       | 400  | 9000     | 1500  | <200     |    | Avg 62900 Fe<br><200 Ni, Se                               | Kairei vent field, Indian Ridge                         | Wang et al. (2014)                   |
| 17   | 96.9     | 726     | 3085       | 0.06 | 12530    | 1718  | 86       |    | Avg 16066 Fe<br>Avg 131 Ga, 200 Ge                        | Wocan hydrothermal field, Carlsberg Ridge, Indian Ocean | Wang et al. (2017)                   |
| 18   | 133      | 149     | 1950       | 186  | 3260     | 178   | 74       |    | Avg 54 Ni<br>Avg 133 Au                                   | Longqi, Southwest Indian Ridge                          | (Zhang et al., 2018)                 |
| 19   | 385      | 61      | 525        | 161  | 1010     | 225   | 64       |    | Avg 19 Ni<br>Avg 35 Au                                    | Duanqiao, Southwest Indian Ridge                        | (Zhang et al., 2018)                 |
| 65   | 4200     | 6600    | 2100       |      | 13400    | 4600  | <200     |    | Avg 1200 Fe, 600 Ga<br>Avg 2700 Hg, 300 Tl                | Hook Ridge, Antarctica                                  | Petersen et al. (2004)               |
| 6    |          |         | 5700-11900 |      | 700-5600 |       |          |    | 2900-77100 Fe                                             | Green Seamount, EPR                                     | Alt et al. (1987)                    |
| 5    | 210-400  | 108-364 | 1820-3150  |      |          |       | 355-1580 |    | 1.1-3.1 Au                                                | Axial Seamount, JDFR                                    | Hannington et al. (1991)             |
|      |          |         |            |      | 0-10000  |       |          |    | <10000-80000 Fe                                           |                                                         | Hannington and Scott (1988)          |
| 34   | 0-2100   |         | 0-5600     |      | 0-5100   |       |          |    | 3500-117000 Fe                                            | Southern JDFR                                           | Paradis et al. (1988)                |
| 30   |          |         | 300-3500   |      |          |       |          |    | 700-187000 Fe                                             | North Cleft, JDFR                                       | Koski et al. (1994)                  |
|      |          |         | 0-4400     |      | 0-8100   |       |          |    |                                                           |                                                         |                                      |
| 3    |          |         |            |      |          |       |          |    | 9000-150000 Fe, 0-200 Mn                                  | South Cleft, JDFR                                       | Normark et al. (1983)                |
| 311  | <200     | 4600    | 3800       |      | 2600     | 12900 | 2200     |    | Avg 8000 Fe, 7400 Hg                                      | Palinuro Volcanic Complex, Aeolian Arc, Italy           | Petersen et al. (2014)               |
| 6    |          | 0-1000  | 5200-      |      | 800-     |       |          |    | 500-4300 Fe                                               | Hakurei Deposit, Bayonnaise Knoll,                      | Watanabe and Hayashi (2014)          |

| No. | Ag    | As         | Cd               | Co    | Cu                     | Pb              | Sb   | Zn                              | Other                                    | Location (setting)                            | Authors                                 |
|-----|-------|------------|------------------|-------|------------------------|-----------------|------|---------------------------------|------------------------------------------|-----------------------------------------------|-----------------------------------------|
| 4   |       |            | 6300<br>500-5300 |       | 6500<br>1800-<br>12300 |                 |      |                                 | 189100-236100 Fe<br>6300-120400 Mn       | Uzu-Bonin Arc<br>Escanaba Trough, Gorda Ridge | Zierenberg and Shanks (1983)            |
| 15  |       |            |                  |       | 3000-<br>7000          |                 |      |                                 | <1000-27000 Fe<br><1000-4000 Mn          | Central Okinawa Trough                        | Halbach et al. (1993)                   |
| 8   |       |            | 1200-<br>3300    | 0-300 | 0-500                  |                 |      |                                 | 10900-26200 Fe<br>1600-4700 Mn, 0-600 Ni | North Knoll, Iheya Ridge, Okinawa<br>Trough   | Ueno et al. (2003)                      |
| 82  |       |            | 400-900          |       | 1100-<br>13700         |                 |      |                                 | 2100-106800 Fe<br>2600-15600 Mn          | Yonaguni Knoll, Okinawa Trough                | Suzuki et al. (2008)                    |
| 7   |       |            | 200-5000         |       | 0-8900                 |                 |      |                                 | 2900-58200 Fe<br>100-1200 Mn             | Alice Spring Field, Mariana Trough            | Iwaida and Ueno (2005)                  |
|     |       |            | 300-1700         |       |                        |                 |      |                                 | 150600-241200 Fe<br>900-7000 Mn          | Guaymas Basin, Gulf of California             | Koski et al. (1985)                     |
| 7   | 700   | 11000      |                  |       | 38000                  | 15000           | <500 |                                 | 20000 Fe                                 | Pacmanus Chimney, PNG                         | Binns and Scott (1993)                  |
| 52  |       | 1664       |                  |       |                        |                 | 1576 |                                 | 43.3 Au, 3.57 Se, 0.02 Te                | Roman Ruins, Pacmanus, PNG                    | Wohlgemuth-Ueberwasser et al.<br>(2015) |
| 24  |       | 1216.6     |                  |       | 3433.3                 | 1760            | 1700 |                                 | 35766.6 Fe                               | Roman Ruins, Pacmanus, PNG                    |                                         |
| 6   |       | 17269      |                  |       |                        |                 | 167  |                                 | 2.45 Au, 9.42 Se, bdl Te                 | Satanic Mills, Pacmanus, PNG                  |                                         |
| 3   |       | 1600       |                  |       | 5600                   | 23500           | 100  |                                 | 7000 Fe                                  | Satanic Mills, Pacmanus, PNG                  | Kristall et al. (2006)                  |
|     |       |            |                  |       |                        |                 |      | Sphalerite – Wurtzite ((ZnFe)S) |                                          |                                               |                                         |
| 30  |       |            |                  |       | bdl-<br>38500          |                 |      |                                 | 45300-119200 Fe<br>500-3300 Mn           | Mothra hydrothermal field, JDFR               |                                         |
| 44  | <400  | <300 – 400 | 1580             | <200  | <700-<br>9100          | <1000 –<br>2550 | <400 |                                 | <300 – 6542 Mn<br><500 – 246793 Fe       | Endeavour Segment, JDFR                       | Tivey et al. (1999)                     |
|     |       |            |                  |       |                        |                 |      | Wurtzite ((ZnFe)S)              |                                          |                                               | Paradis et al. (1988)                   |
| 7   | 0-900 |            | 400-7100         |       | 1500-<br>8100          |                 |      |                                 | 65200-165500 Fe                          | Southern JDFR                                 |                                         |
|     |       |            |                  |       |                        |                 |      |                                 |                                          |                                               |                                         |
| 33  |       |            | 1150-<br>7000    |       |                        |                 |      |                                 | 32100-175000 Fe                          | North Cleft, JDFR                             | Koski et al. (1994)                     |
|     |       |            | 0-2900           |       |                        |                 |      |                                 |                                          |                                               | Normark et al. (1983)                   |
| 2   |       |            |                  |       | 0                      |                 |      |                                 | 36000-128000 Fe                          | South Cleft, JDFR                             |                                         |
| 4   |       |            | 1700-<br>4200    | 0-600 | 0-2200                 |                 |      |                                 | 21600-60700 Fe<br>4600-10000 Mn          | North Knoll, Iheya Ridge, Okinawa<br>Trough   |                                         |

| No.   | Ag      | As     | Cd      | Co       | Cu     | Pb    | Sb       | Zn         | Other                                                                                    | Location (setting)                                      | Authors                              |
|-------|---------|--------|---------|----------|--------|-------|----------|------------|------------------------------------------------------------------------------------------|---------------------------------------------------------|--------------------------------------|
|       |         |        |         |          |        |       |          |            | 0-700 Ni                                                                                 |                                                         |                                      |
| 19    |         |        | 1500    |          | 1900   |       |          |            | 28800 Fe<br>3200 Mn                                                                      | Yonaguni Knoll, Okinawa Trough                          | Suzuki et al. (2008)                 |
|       | 58-378  |        | 2-258   |          |        | 0-379 | 0-110.83 | 180-26100  | Chalcopyrite (CuFeS <sub>2</sub> )<br>0-129 Mn<br>0.32-953 Mo<br>101-770 Se<br>0-116.2 V | Menez Gwen Field, MAR                                   | Lein et al. (2010)                   |
|       | 13-48   | 6-65   | <10     | 113-1053 |        |       | 0.4-5    |            | 0.2-0.9 Au<br>98-498 Co<br>205-640 Se                                                    | TAG hydrothermal field, MAR                             | Hannington et al. (1991)             |
| 90    | <400    |        |         | <400     |        | <1000 |          | 1223-9820  | <300 – 1060 Se                                                                           | TAG hydrothermal field, MAR                             | Tivey et al. (1995)                  |
| 10-50 | 8.98    | 7.21   | 3.85    | 39.8     | 346300 | 5.74  | 0.67     | 192.1      | Avg 0.46 Bi<br>Avg 1.61 Mn<br>Avg 24.5 Ni                                                | TAG hydrothermal field, MAR                             | Grant et al. (2018)                  |
| 35    | 100-700 |        | 200-600 | 200-2000 |        |       |          | 1300-12100 | 100-400 Ni                                                                               |                                                         | Marques et al. (2006)                |
|       |         |        |         |          |        |       |          | 416        |                                                                                          | Rainbow vent field, MAR                                 |                                      |
| 10    | 150     |        |         | 3150     |        |       |          |            | 1150 Au<br>1400 Ni                                                                       |                                                         | Mozgova et al. (2005)                |
| 15    |         | 37.9   |         |          |        |       | 0.46     |            | 0.06 Au, 204 Se, 4.73 Te                                                                 | Turtle Pits, MAR                                        | Wohlgemuth-Ueberwasser et al. (2015) |
| 24    |         | bdl    |         |          |        | bdl   | bdl      | 1140       |                                                                                          | Turtle Pits, MAR                                        |                                      |
| 29    |         | 92.4   |         |          |        |       | 22       |            | 3.12 Au, 119 Se, 39.2 Te                                                                 | Logatchev, MAR                                          | Wohlgemuth-Ueberwasser et al. (2015) |
| 18    |         | 300    |         |          |        | bdl   | 100      | 1550       |                                                                                          | Logatchev, MAR                                          |                                      |
|       | <5      | 49-100 | <10     | 19-383   |        |       | 0.6-0.7  |            | <0.1 Au<br>77-443 Mo<br>190-310 Se                                                       | Southern Explorer Ridge                                 | Hannington et al. (1991)             |
| 33    | <200    | <200   | <200    | <200     |        | <200  | <200     | 100        | <200 Ni<br>300 Se                                                                        | Kairei vent field, Indian Ridge                         | Wang et al. (2014)                   |
| 22    | 65.3    | 225    | 46.9    | 0.1      |        | 120   | 22       | 1040       | Avg 50 Se<br>Avg 80.8 Ge                                                                 | Wocan hydrothermal field, Carlsberg Ridge, Indian Ocean | Wang et al. (2017)                   |
| 11    | 330     | 192    | 141     | 748      |        | 41    | 43       | 6253       | Avg 23 Ni<br>Avg 149 Au                                                                  | Longqi, Southwest Indian Ridge                          | (Zhang et al., 2018)                 |
| 16    | 289     | 162    | 77      | 616      |        | 67    | 89       | 1247       | Avg 23 Se<br>Avg 18 Ni                                                                   | Duanqiao, Southwest Indian Ridge                        | (Zhang et al., 2018)                 |

| No. | Ag       | As         | Cd      | Co       | Cu | Pb    | Sb   | Zn           | Other                                                                                           | Location (setting)                            | Authors                              |
|-----|----------|------------|---------|----------|----|-------|------|--------------|-------------------------------------------------------------------------------------------------|-----------------------------------------------|--------------------------------------|
|     | 100-1500 |            | 100-700 |          |    |       |      | 1700-10400   | Avg 135 Au                                                                                      | Southern Juan de Fuca Ridge                   | Paradis et al. (1988)                |
| 105 | <200     | <1000      | <200    |          |    | <2000 | 900  | 300          | 100 Hg                                                                                          | Palinuro Volcanic Complex, Aeolian Arc, Italy | Petersen et al. (2014)               |
| 4   |          |            | 125     |          |    |       |      | 3925         | 100 Mn                                                                                          | Alice Spring Field, Mariana Trough            | Iwaida and Ueno (2005)               |
| 4   |          |            | 0       |          |    |       |      | 14850        | 400 Mn                                                                                          | North Knoll, Iheya Ridge, Okinawa Trough      | Ueno et al. (2003)                   |
| 5   | <500     | 800        |         |          |    | <1400 | <400 | <500         |                                                                                                 | Pacmanus Chimney, PNG                         | Binns and Scott (1993)               |
| 75  |          | 470        |         |          |    |       | 84.5 |              | 4.84 Au, 23.5 Se, 0.32 Te                                                                       | Roman Ruins, Pacmanus, PNG                    | Wohlgemuth-Ueberwasser et al. (2015) |
| 43  |          | bdl        |         |          |    | 160   | 100  | 2350         |                                                                                                 | Roman Ruins, Pacmanus, PNG                    |                                      |
| 25  |          | 15237      |         |          |    |       | 875  |              | 4.99 Au, 1.39 Se, 1.66 Te                                                                       | Satanic Mills, Pacmanus, PNG                  |                                      |
| 15  |          | bdl        |         |          |    | 200   | 300  | 5850         |                                                                                                 | Satanic Mills, Pacmanus, PNG                  |                                      |
| 64  | <400     | <400 – 600 |         | <400     |    | <1000 | <100 | 1600 – 12150 | Chalcopyrite (CuFeS <sub>2</sub> ) – Isocubanite (CuFe <sub>2</sub> S <sub>3</sub> )<br><400 Mn | Endeavour Segment, JDFR                       | Tivey et al. (1999)                  |
| 10  |          | 22.4       |         |          |    |       | 7.63 |              | Isocubanite (CuFe <sub>2</sub> S <sub>3</sub> )<br>8.15 Au, 40.9 Se, 7.9 Te                     | Logatchev, MAR                                | Wohlgemuth-Ueberwasser et al. (2015) |
| 8   |          | bdl        |         |          |    | bdl   | bdl  | 5300         |                                                                                                 | Logatchev, MAR                                |                                      |
| 32  | 100-300  |            | 100-300 | 700-5200 |    |       |      | 300-3100     | 100-700 Ni                                                                                      | Rainbow vent field, MAR                       | Marques et al. (2006)                |
| 2   | <200-200 | <200-400   | <200    | 1050     |    | <200  | <200 | 1550         | <200 Ni<br>1400-2000 Se                                                                         | Kairei vent field, Indian Ridge               | Wang et al. (2014)                   |
| 7   | 264      | 326        | 49      | 1390     |    | 124   | 64   | 3237         | Avg 151 Au<br>Avg 13 Se                                                                         | Longqi, Southwest Indian Ridge                | (Zhang et al., 2018)                 |
|     | 400-900  |            | 100-700 |          |    |       |      | 3800-7100    |                                                                                                 | Southern JDFR                                 | Paradis et al. (1988)                |
| 15  |          | 43.5       |         |          |    |       | 17.8 |              | Chalcocite (Cu <sub>2</sub> S)<br>4.92 Au, 87.9 Se, 4.4 Te                                      | Logatchev, MAR                                | Wohlgemuth-Ueberwasser et al. (2015) |
| 5   |          | 749        |         |          |    |       | 304  |              | 4.16 Au, bdl Se, 0.69 Te                                                                        | Satanic Mills, Pacmanus, PNG                  | Wohlgemuth-Ueberwasser et al. (2015) |
| 3   | 1700     | <400       |         |          |    | <1400 | <600 |              | Bornite (Cu <sub>5</sub> FeS <sub>4</sub> )                                                     | Pacmanus Chimney, PNG                         | Binns and Scott (1993)               |
| 11  | 230      | 9.97       | 5.56    | 0.06     |    | 84.4  | 4.57 | 200          | 0.826 Au                                                                                        | Wocan hydrothermal field, Carlsberg           | Wang et al. (2017)                   |

| No. | Ag          | As            | Cd    | Co       | Cu | Pb        | Sb           | Zn          | Other                                                                                                                           | Location (setting)                                      | Authors                              |
|-----|-------------|---------------|-------|----------|----|-----------|--------------|-------------|---------------------------------------------------------------------------------------------------------------------------------|---------------------------------------------------------|--------------------------------------|
|     |             |               |       |          |    |           |              |             | 9.24 Ge                                                                                                                         | Ridge, Indian Ocean                                     |                                      |
|     |             |               |       |          |    |           |              |             | Chalcocite-Covellite (Cu <sub>2</sub> S-CuS)                                                                                    |                                                         |                                      |
| 12  |             | 6.75          |       |          |    |           | 1.38         |             | 0.55 Au, 7.3 Te                                                                                                                 | Logatchev, MAR                                          | Wohlgemuth-Ueberwasser et al. (2015) |
| 14  |             | 100           |       |          |    | bdl       | 100          | 100         |                                                                                                                                 | Logatchev, MAR                                          |                                      |
|     |             |               |       |          |    |           |              |             | Covellite (CuS)                                                                                                                 |                                                         |                                      |
| 3   | 0-700       | 0-3700        | 0-300 | 0-500    |    |           | 0-10         | 0-400       | Au, 100 In, 6-300 Mn                                                                                                            | Menez Gwen Field, MAR                                   | Lein et al. (2010)                   |
|     |             |               |       |          |    |           |              |             | 1-300 Mn                                                                                                                        |                                                         |                                      |
| 8   | <200        | <200          | <200  | <200-200 |    | <200      | <200         | <200        | <200-200 Ni                                                                                                                     | Kairei vent field, Indian Ridge                         | Wang et al. (2014)                   |
|     |             |               |       |          |    |           |              |             | <200-500 Se                                                                                                                     |                                                         |                                      |
| 2   | 1050        | <200          |       |          |    |           | 200          | 1100        | 150 Hg, <200 Se                                                                                                                 | Hook Ridge, Antarctica                                  | Petersen et al. (2004)               |
|     |             |               |       |          |    |           |              |             | Digenite (Cu <sub>9</sub> S <sub>5</sub> )                                                                                      |                                                         |                                      |
| 9   | <200        | <200          | <200  | <200     |    | <200      | <200         | <200        | <200 Ni, <200 Se                                                                                                                | Kairei vent field, Indian Ridge                         | Wang et al. (2014)                   |
| 11  | 350         | 17.7          | 5.39  | 0.08     |    | 77.5      | 3.12         | b.d.l.      | Avg 41000 Fe                                                                                                                    | Wocan hydrothermal field, Carlsberg Ridge, Indian Ocean | Wang et al. (2017)                   |
|     |             |               |       |          |    |           |              |             | 5.45 Ga, 4.78 Ge                                                                                                                |                                                         |                                      |
|     |             |               |       |          |    |           |              |             | Enargite (Cu <sub>3</sub> AsS <sub>4</sub> )                                                                                    |                                                         |                                      |
| 10  | 500         |               |       |          |    |           | 300          | 9400        | 5200 Fe, 300 Hg, 1000 Se                                                                                                        | Hook Ridge, Antarctica                                  | Petersen et al. (2004)               |
| 30  | 2800        |               | <200  |          |    | 13100     | 13300        | 17800       | 12400 Fe, 5100 Hg                                                                                                               | Palinuro Volcanic Complex, Aeolian Arc, Italy           | Petersen et al. (2014)               |
| 3   |             |               |       |          |    | 700-14600 | 0-700        | 3300-15800  | 2700-8400 Fe                                                                                                                    | Hakurei Deposit, Bayonnaise Knoll, Uzu-Bonin-Arc        | Watanabe and Hayashi (2014)          |
| 25  | 200-7400    |               | 0-100 |          |    |           | 200-2400     |             | 100-3500 Fe                                                                                                                     | Yonaguni Knoll, Okinawa Trough                          | Suzuki et al. (2008)                 |
|     |             |               |       |          |    |           |              |             | 100-700 Mn, 200-500 Mo                                                                                                          |                                                         |                                      |
|     |             |               |       |          |    |           |              |             | Tennantite/Tetrahedrite (Cu <sub>12</sub> As <sub>4</sub> Si <sub>13</sub> -Cu <sub>12</sub> Sb <sub>4</sub> Si <sub>13</sub> ) |                                                         |                                      |
| 38  | 8000        | 178500        |       |          |    | 4500      | 20900        | 88500       | 3800 Fe, 1000 Hg, 900 Se                                                                                                        | Hook Ridge, Antarctica                                  | Petersen et al. (2004)               |
| 368 | 2700        | 40400         | <200  |          |    | <2000     | 241800       | 24000       | 42100 Fe, 4400 Hg                                                                                                               | Palinuro Volcanic Complex, Aeolian Arc, Italy           | Petersen et al. (2014)               |
|     |             |               |       |          |    |           |              |             | 0-34500                                                                                                                         | 7200-7700 Fe                                            |                                      |
|     |             |               |       |          |    |           |              |             | 72800-96400                                                                                                                     |                                                         |                                      |
| 8   | 10000-73250 | 166300-198400 |       |          |    |           | 17250-145000 | 55000-67750 | 2000-6000 Fe                                                                                                                    | Hakurei Deposit, Bayonnaise Knoll, Uzu-Bonin-Arc        | Watanabe and Hayashi (2014)          |
|     |             |               |       |          |    |           |              |             |                                                                                                                                 | Central Okinawa Trough                                  | Halbach et al. (1993)                |
| 5   | 74600       | 71120         |       |          |    | 2320      | 167440       | 61640       | 11080 Fe, 1140 Mn                                                                                                               | North Knoll, Iheya Ridge, Okinawa Trough                | Ueno et al. (2003)                   |
|     |             |               |       |          |    |           |              |             |                                                                                                                                 |                                                         |                                      |
|     |             |               |       |          |    |           |              |             | 51000-                                                                                                                          |                                                         |                                      |
| 28  | 1800-33600  | 99500-133500  | 0-200 |          |    |           | 200-33800    | 59600       | 5500-8000 Fe, 400-15300 Mn                                                                                                      | Yonaguni Knoll, Okinawa Trough                          | Suzuki et al. (2008)                 |
| 7   | 1100-1600   | 188000-191000 |       |          |    | 3500-6900 | 900-1200     | 25000-47000 | 46000-64000 Fe                                                                                                                  | Pacmanus Chimney, PNG                                   | Binns and Scott (1993)               |

| No. | Ag       | As     | Cd   | Co | Cu           | Pb  | Sb   | Zn    | Other                                | Location (setting)                               | Authors                              |
|-----|----------|--------|------|----|--------------|-----|------|-------|--------------------------------------|--------------------------------------------------|--------------------------------------|
| 7   |          | 81298  |      |    |              |     | 3609 |       | 15.9 Au, <5 Se, 0.5 Te               | Satanic Mills, Pacmanus, PNG                     | Wohlgemuth-Ueberwasser et al. (2015) |
| 5   |          | 198500 |      |    |              | 750 | 5650 | 18550 | 61850 Fe<br>Galena (PbS)             | Satanic Mills, Pacmanus, PNG                     |                                      |
| 24  | 100      | <200   | 1100 |    | 1800         |     | <200 | 3400  | <200 Fe, <200 Ga, <200 Hg<br><200 Se | Hook Ridge, Antarctica                           | Petersen et al. (2004)               |
| 36  | 500      | <1000  | 800  |    | 300          |     | 9400 | 2300  | 300 Fe, 200 Hg                       | Palinuro Volcanic Complex, Aeolian<br>Arc, Italy | Petersen et al. (2014)               |
| 3   | 1266.6   |        |      |    | 966.6        |     | 1100 |       |                                      | Alice Spring Field, Mariana Trough               | Iwaida and Ueno (2005)               |
| 5   | 2160     |        |      |    | 320          |     | 2740 |       |                                      | North Knoll, Iheya Ridge, Okinawa<br>Trough      | Ueno et al. (2003)                   |
| 83  | 200-1800 |        |      |    | 700-<br>7700 |     |      |       |                                      | Yonaguni Knoll, Okinawa Trough                   | Suzuki et al. (2008)                 |
| 7   | 600      |        |      |    |              |     |      | 2000  | 4416 Fe, 557 Se                      | Endeavour Segment, JDFR                          | Tivey et al. (1999)                  |
